## Widespread inhibitory projections from the interposed cerebellar nucleus

Elena N. Judd<sup>1</sup>, Samantha M. Lewis<sup>1</sup>, Daniel G. Heck<sup>1</sup>, Abigail L. Person<sup>1</sup>

1. Department of Physiology and Biophysics, University of Colorado School of Medicine, Anschutz Medical Campus

**Contact:** [abigail.person@cuanschutz.edu](mailto:abigail.person@cuanschutz.edu)

### Abstract

The cerebellum consists of parallel parasagittal modules that contribute to diverse behaviors, spanning motor to cognitive. Recent work illustrating a role for the anterior interposed nucleus (IntA) in reach control in mice raised questions of its anatomical organization that could confer functional specificity. We employed intersectional cell- and projection- specific labeling methods to map IntA inputs and outputs. In contrast to long-standing dogma of primarily excitatory outputs and restricted inferior olive targeting inhibitory output, we found that inhibitory IntA neurons ramified widely within the brainstem, targeting both motor- and sensory-related nuclei, suggesting potential functional roles in disinhibitory control or predictive sensory cancellation. Using monosynaptic rabies tracing, we then found that excitatory output neurons receive fewer and more precisely organized inputs than inhibitory neurons, which may set them up for distinct computations. Together these data suggest IntA contains at least two distinct output circuits and promise advances in identifying parallel computations of the cerebellum.

### Introduction

The cerebellum plays a critical role in refining motor control through learning. The sole output structures of the cerebellum, the cerebellar nuclei (CbN), are proposed to relay predictive computations of the cerebellar cortex and store well-learned patterns, placing the nuclei in a central position to implement cerebellar control. The CbN house diverse neuronal subtypes that differ in their targets. Recent studies have greatly expanded our understanding of this diversity, using approaches such as genomic profiling and projection specific tracing (Bagnall et al., 2009; Chan-Palay, 1977; Fujita et al., 2020; Kobschull et al., 2020; Uusisaari & Knöpfel, 2010, 2011; Uusisaari et al., 2007; Husson et al., 2014; Ankri et al., 2015; Canto et al., 2016). Through these studies, we know that multiple diverse output channels intermingle (Fujita et al., 2020; Low et al., 2018; Sathyamurthy et al., 2020), widespread collateralization is common, and genetic diversity of excitatory projection neurons varies systematically along the medio-lateral extent of the nuclei (Kobschull et al., 2020).

The mouse anterior interposed nucleus (IntA) mediates conditioned eyelid responses as well as sculpts reach kinematics (Becker & Person, 2019; Cooper et al., 2000; Low et al., 2018; ten Brinke et al., 2017). IntA excitatory neurons project to a variety of motor related spinal cord and brainstem targets, as well as collateralize to motor thalamus. Functional studies suggest multiple cell types of the nuclei may play a role in limb control in reaching and locomotion. Ablation of a subset of IntA glutamatergic cells that express Urocortin3, for example, disrupts accurate limb positioning and timing during a reach to grasp task and locomotion (Low et al., 2018). Excitation

48 of presumptive glutamatergic cells demarcated by Ntsr1-cre in IntA disrupts endpoint  
49 positioning in a reach to grasp task (Becker & Person, 2019). Finally, chemogenetic silencing  
50 of excitatory neurons that project ipsilaterally to the spinal cord also interfered with reach  
51 success in mice (Sathyamurthy et al., 2020). Together, these studies suggest projections  
52 from diverse types within IntA to forelimb movement related brain structures may provide a  
53 substrate for the CbN to coordinate movement precision and balance during forelimb tasks.  
54

55 Understandably, these studies have focused almost exclusively on glutamatergic  
56 cell types. Interestingly, however, ablation of nucleo-olivary cells demarcated with Sox14  
57 expression also resulted in motor coordination deficits, while not impairing associative learning  
58 (Prekop et al., 2018). This motor deficit is surprising since inhibitory output neurons from  
59 intermediate and lateral nuclei are expected to only innervate the IO. The medial nucleus  
60 (fastigial) is thought to be unique among the nuclei in that its inhibitory output population  
61 includes large glycinergic neurons that project to ipsilateral brainstem targets outside the IO  
62 (Bagnall et al., 2009). Indeed, consistent with traditional views of GABAergic output  
63 channels, tracing of Sox14-Cre neurons of the lateral nucleus revealed projections to the IO  
64 (Prekop et al., 2018). However, hints in the literature suggest that there may be more extensive  
65 inhibitory output from the nuclei than is currently appreciated (Locke et al., 2018; Turecek &  
66 Regehr, 2020). Nevertheless, inhibitory projections from intermediate cerebellum have not been  
67 the focus of investigation, to our knowledge.  
68

69 Here we use a range of viral tracing methods to isolate and map projections from and  
70 to different IntA cell types, including inhibitory neurons, defined through intersectional labeling  
71 methods using single or multiple recombinases coupled with pathway-specific labeling (Fenno et  
72 al., 2014). This method permitted analysis of collateralization more powerful than traditional  
73 dual-retrograde labeling strategies. We elucidate the projection “fingerprints” of specific cell-  
74 types and projection-types. Surprisingly, we observed widespread inhibitory outputs, comprised  
75 of putative collaterals of IO-projecting neurons, that target both ipsilateral and contralateral  
76 brainstem and midbrain structures, with implications for a novel role of inhibitory neurons in  
77 online motor control and regulating IO error signaling. Monosynaptic rabies transsynaptic  
78 tracing (Kim et al., 2016; Wickersham et al., 2010) restricted to excitatory premotor neuron  
79 populations through the selective expression of Cre recombinase under the Ntsr1 promoter (Gong  
80 et al., 2007) and inhibitory neurons through Cre expression controlled under the Gad1 locus  
81 (Higo et al., 2009; Vong et al., 2011) revealed dramatically distinct and reproducible patterns of  
82 presynaptic inputs labeled following rabies expression targeted to distinct cell classes in the  
83 nuclei. Together these experiments provide new insight into input/output diversity of the  
84 intermediate cerebellum, suggest potential functional diversity of parallel channels, and provide  
85 anatomical targets for functional studies aimed at evaluating these putative roles.  
86

## 87 **Results**

### 88 *Anterograde tracing of inhibitory IntA neurons*

89 To determine projection patterns of inhibitory neurons of IntA (iIntA), we selectively labeled  
90 them in Gad1-Cre (n = 5) or Vgat-Cre (n = 4, See Methods) transgenic mice injected with  
91 AAV2.EF1a.DIO.YFP. Based on previous literature suggesting that inhibitory projections to  
92 targets other than IO may be restricted to large glycinergic neurons which are absent from IntA  
93 (Ankri et al., 2015; Bagnall et al., 2009; Esposito et al., 2014; Prekop et al., 2018), we expected  
94

95 projections from iIntA to exclusively target IO. However, in both transgenic lines, axon  
96 terminals were labeled throughout the brainstem and midbrain, suggesting previously unknown  
97 projections of inhibitory neurons from IntA.

98  
99 As expected, iIntA neurons densely innervated the dorsal accessory olive (Figure 1C). Moderate  
100 label in the principle subnucleus and Cap of Kooy, a known target of VEST suggested some  
101 potential for injection site spillover (but see below; (Balaban & Beryozkin, 1994; Fredette &  
102 Mugnaini, 1991; Prekop et al., 2018; Ruigrok & Voogd, 1990, 2000; Want et al., 1989).  
103 Inhibitory IntA neurons also produced extensive terminal fields outside IO, within the medulla  
104 and midbrain. Modestly dense but spatially extensive terminal fields ramified in the posterior  
105 medulla along the anterior-posterior axis, with ipsilateral label in the dorsal medullary reticular  
106 nucleus (MDRN<sub>d</sub>), parvicellular reticular nucleus (PARN) and bilateral label in the  
107 gigantocellular reticular nucleus (GRN) and the ventral region of the medullary reticular nucleus  
108 (MDRN<sub>v</sub>) indicating connectivity with forelimb associated brainstem nuclei (Esposito et al.,  
109 2014) (Figure 1C). We did not observe iIntA terminals or axons within the spinal cord of any  
110 specimens, suggesting that iIntA neurons do not directly influence circuits within the spinal cord.

111  
112 iIntA axons extended through the pontine reticular nuclei (PRN) to innervate the tegmental  
113 reticular nucleus of the pons (TRN) and the basilar pontine nuclei (Figure 1D), common  
114 precerebellar mossy fiber centers. iIntA neurons also innervated medial RN (Figure 1E) with  
115 unique morphology, as if terminals focally innervated individual or small clusters of RN somata,  
116 a morphological trait not observed following labeling of excitatory neurons (see Figure 5A).  
117 Vgat neurons targeted RN bilaterally while Gad1 neurons only innervated the contralateral RN.  
118 iIntA axons progressed to the caudal diencephalon, targeting the ipsilateral ZI (2/4 Vgat and 1/5  
119 Gad1 specimen) and the contralateral thalamus (VM, VPM, VAL) in a similar location as  
120 observed for excitatory neurons (see below). However, Vgat neurons did not target VAL or VM.  
121 Among sensory brainstem structures, terminal fields ramified within subdivisions of the  
122 ipsilateral external cuneate nucleus (ECU), dorsal column nuclei (DCN), nucleus of the solitary  
123 tract (NTS), spinal trigeminal nucleus (SPV), especially the lateral edge, parabrachial nuclei  
124 (PB), and principle sensory nuclei of the trigeminal (PSV). Vgat neurons generally targeted these  
125 regions more strongly than Gad1 neurons, though terminals were identified in both transgenic  
126 lines.  
127

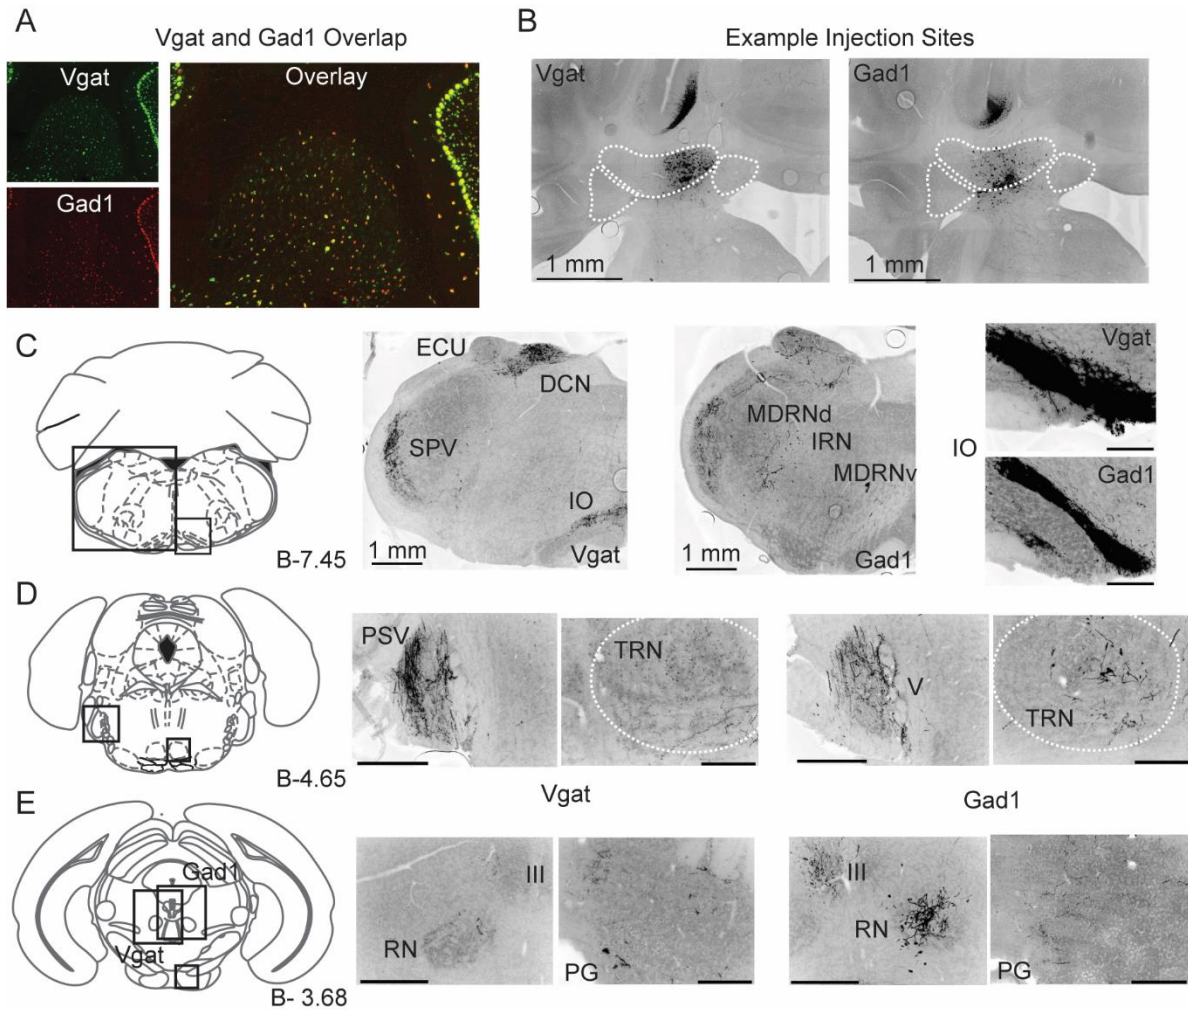

128  
 129 Figure 1. Inhibitory projections from IntA. (A) Dual fluorescent in situ hybridization showing largely overlapping populations  
 130 of Vgat+ and Gad1+ cells within Int. Purkinje cells seen to right of image expressing both Gad1 and Vgat. (B) Example injection  
 131 sites within Gad1-Cre and Vgat-Cre mice. Boundaries of the cerebellar nuclei are outlined. Scale bars represent 1 mm. Images  
 132 are oriented so that ipsilateral projections are depicted left and contralateral projections are depicted as right of midline in Atlas  
 133 images. Dense label ventral to IntA are exiting axons. (C) Example terminal fields in the ipsilateral caudal  
 134 brainstem (approximately 7.45 mm posterior to Bregma). Terminals from example Vgat-Cre mouse (left) and Gad1-Cre  
 135 mouse (right). Scale bar = 1 mm. Terminals within the IO (far right) in Vgat-Cre (top) and Gad1-Cre (bottom) mice. Scale bar =  
 136 200  $\mu$ m. ECU = external cuneate nucleus, DCN = dorsal column nuclei, SPV = spinal trigeminal nucleus, IO= inferior olive,  
 137 MDRN = medullary reticular nucleus (dorsal, d or ventral, v), IRN = intermediate reticular nucleus. (D) Example terminal fields  
 138 in the rostral brainstem (approximately 4.65 mm posterior to Bregma). Dense innervation of the PSV (principle sensory nucleus  
 139 of the trigeminal, left, scale = 500  $\mu$ m) and sparse innervation of the TRN (tegmental reticular nucleus of the pons, outlined,  
 140 right, scale = 200  $\mu$ m) in Vgat-Cre (left group) and Gad1-Cre mice (right group). Note terminal fields in TRN are denser in  
 141 Gad1 than Vgat-Cre mice. (E) Example terminal fields in the midbrain (approximately 3.68 mm posterior to Bregma). Sparse  
 142 targeting of the ipsilateral RN (red nucleus) and III (oculomotor nucleus, left-most image, scale bar = 500  $\mu$ m) and anterior  
 143 contralateral PG (pontine grey, scale bar = 200  $\mu$ m) in example Vgat-Cre mouse shown in left group. Denser targeting of the  
 144 ipsilateral III and contralateral RN (scale bar = 500  $\mu$ m) but more sparse targeting of the anterior contralateral PG (scale bar =  
 145 200  $\mu$ m) seen in Gad1-Cre example mouse. The rostral PG (B-3.93) is more heavily targeted than the anterior PG (shown here);  
 146 see Figures S1 and S2 for example terminals in this region.

147  
 148  
 149 As expected, we observed innervation of the cerebellar cortex by iIntA in all 9 animals,  
 150 especially to lobules 8-9, Cop, and the flocculus (Fl), terminating in the granule cell layer of the  
 151 cerebellar cortex with beaded axons (see Figure 5A for example (Ankri et al., 2015)).  
 152 Vgat neurons targeted all cerebellar lobules, even extending contralaterally to target lobules in

153 the opposite hemisphere (see Table 1 for a full list of brain regions targeted and average  
 154 projection strengths). We observed a less consistent projection to lobules 4 /5, Cr 1/ 2, PM, and  
 155 Simplex (1-3 of 6 specimens) by Gad1-Cre mice. Several specimens showed minor label of  
 156 inhibitory cells in the ventral Cb-Ctx just dorsal to IntA, but nucleocortical terminals that were  
 157 included in the projection analysis were not located in the same topographical area.  
 158

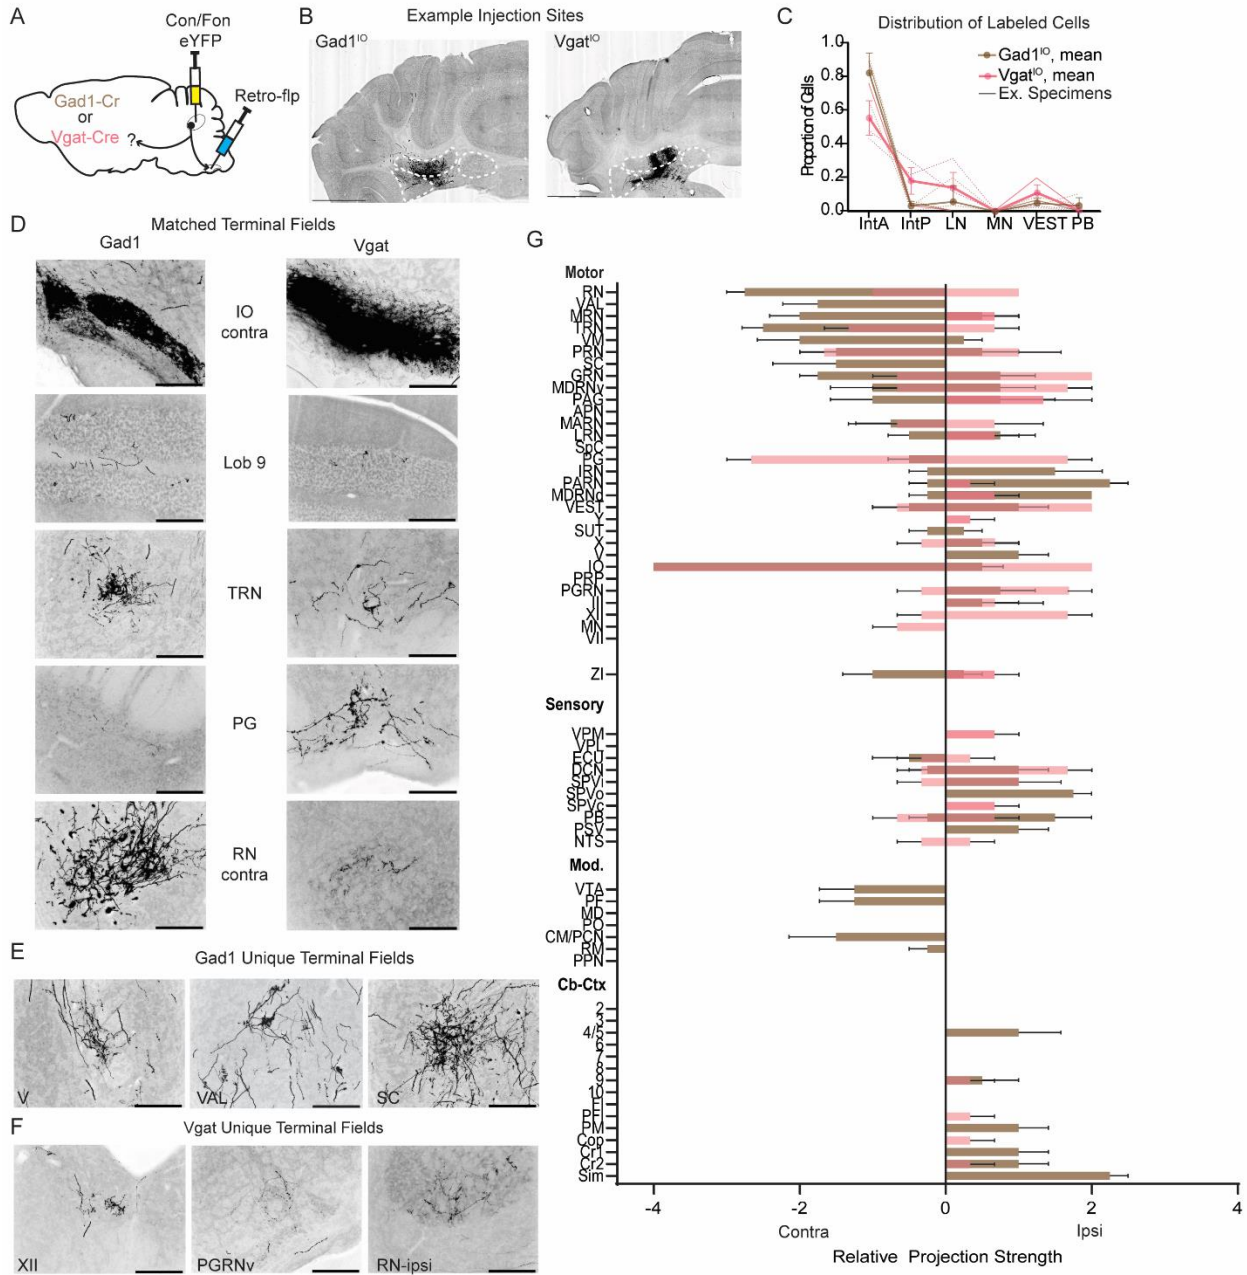

159  
 160 Figure 2. Intersectional labeling of IO-projecting inhibitory neurons in IntA. (A) Schematic of injection paradigm. (B) Example  
 161 injection sites in Gad1 (left) or Vgat (right)-Cre mice. Scale bar represents 1 mm. (C) Analysis of the distribution of labeled  
 162 cells from initial injection of Con/Fon-eYFP. Pink denotes Vgat-Cre specimens, brown denotes Gad1-Cre specimens. Data with  
 163 symbols are the mean for all specimen within the cohort, individual specimen data are shown with dotted lines, and the example  
 164 specimen whose terminal fields are imaged below are depicted with a solid line. (D) Matched terminal fields within IO (inferior  
 165 olive), Lob9, TRN (tegmental reticular nucleus of the pons), PG (pontine grey), and RN (red nucleus) are seen in both  
 166 Gad1 (left) and Vgat-Cre (right) mice. Scale bars = 200  $\mu$ m. Note Vgat-Cre neurons project more densely to PG and less densely  
 167 to TRN and RN than Gad1-Cre neurons. (E) Terminal fields unique to Gad1-Cre mice: V (facial motor nucleus, left),

168 VAL (ventral anterior lateral nucleus of the thalamus, middle), SC (superior colliculus, right). Scale bars = 200  
169  $\mu\text{m}$ s. (F) Terminal fields unique to Vgat-Cre mice: XII (hypoglossal nuclei, left), PGRN (paragigantocellular reticular nucleus,  
170 ventral; middle), ipsilateral RN (right). Scale bars = 200  $\mu\text{m}$ s. (G) Graphical representation of average projection strength in all  
171 targeted regions for Gad1<sup>10</sup> (n = 4; brown) and Vgat<sup>10</sup> (n = 3; pink) mice.  
172

### 173 *Intersectional label of iIntA projections to IO*

174 The terminal labeling observed in brainstem and midbrain following Gad1 and Vgat-  
175 Cre restricted label of iIntA strongly suggested widespread inhibitory channels from the  
176 intermediate cerebellum. Several important questions and caveats remained, however, including  
177 that Purkinje neuron label was unavoidable with direct injection into Gad1-Cre and Vgat-  
178 Cre IntA. We next used an intersectional approach to restrict label to IO-  
179 projecting iIntA neurons (Fenno et al., 2017). In Gad1-cre (n=4) and Vgat-cre mice (n=3), we  
180 injected the contralateral IO with AAVretro-EF1a-Flp followed by a two-recombinase-dependent  
181 reporter virus (AAV8-hsyn-ConFon-eYFP) into IntA (Figure 2A-B). This method  
182 isolated IntA neurons which project to IO and were Gad1 or Vgat positive. Injections in wildtype  
183 C57/Bl6 mice (n=2) and off-target injections in Gad1-Cre mice (n=3) did not yield YFP positive  
184 neurons in the nuclei. Thus, this method both identifies putative collaterals of IO-  
185 projecting iIntA neurons and controls for the possibility of non-IO projecting non-  
186 specific Cre expression in IntA accounting for brainstem label.  
187

188 Similar to direct injections into iIntA neurons, IO-projecting iIntA innervated forelimb control  
189 associated regions RN, GRN, MDRNv and PARN (Figure 2D, G), even in the most finely  
190 targeted injections. Both cohorts produced terminals in the TRN and PG, though Gad1<sup>10</sup> showed  
191 a preference for TRN and Vgat<sup>10</sup> produced denser terminals in PG (Figure 2D). We  
192 consistently observe terminals in sensory regions SPV, DCN, ECU, and PB with intersectional  
193 label of both Vgat<sup>10</sup> and Gad1<sup>10</sup>. Nucleocortical terminals were observed using intersectional  
194 approaches in both transgenic lines, especially in Crus2 and lobule 9 (Figure 2D, G). In contrast,  
195 Gad1<sup>10</sup> (n = 4) targeted intermediate cerebellar lobules such as 4/5 and Sim while Vgat<sup>10</sup> (n = 3)  
196 targeted Cop and PFl. Gad1<sup>10</sup> and Vgat<sup>10</sup> neurons labeled terminals in numerous brainstem and  
197 midbrain areas, largely corroborating the core results from direct iIntA labeling methods  
198 (Figure 1).  
199

200 Despite the consistency of most targets across labeling methods, some regions were targeted by  
201 only one transgenic line. Gad<sup>10</sup> neurons innervated MDRNv, IRN, V, PSV, SC, and thalamic  
202 nuclei, VAL, CM/PCN, PF, and VM (Figure 2E, G). Vgat<sup>10</sup> neurons produced terminal fields in  
203 the ventral PGRN (PGRNv), XII, ipsilateral ZI, and VPM that were not seen in Gad1<sup>10</sup> injections  
204 (Figure 2F, G). Additionally, Vgat<sup>10</sup> produced sparser bilateral terminals in RN corroborating the  
205 results of projection non-specific tracing. A table summarizing termination patterns  
206 of iIntA neurons following these four labeling methods indicates that brainstem and midbrain  
207 targets are consistently innervated by these cells while diencephalic projections were  
208 only observed in Gad1-cre mice (Table 1).  
209

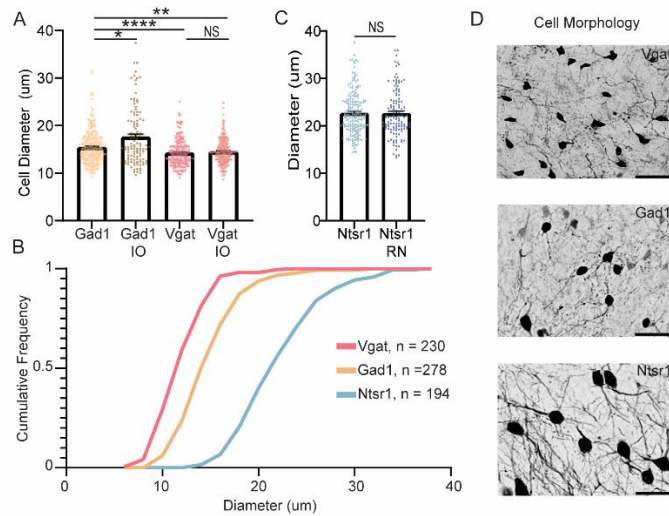

210  
211  
212  
213  
214  
215  
216  
217  
218  
219

Figure 3. Cell sizes differ across classes. (A) Differences in soma diameter of inhibitory IntA neurons based on isolation method. Mean  $\pm$  SEM is plotted. Gad1 neurons ( $n = 278$ , 5 mice) are smaller than Gad1<sup>IO</sup> ( $n = 113$ , 4 mice) neurons ( $p = 0.01$ ; Mann-Whitney unpaired, two tailed T-test) and larger than Vgat ( $n = 230$ , 3 mice;  $p < 0.0001$ ; Mann-Whitney unpaired, two tailed T-test) or Vgat<sup>IO</sup> neurons ( $n = 245$ , 3 mice;  $p = 0.009$ ; Mann-Whitney unpaired, two tailed T-test). (B) Cumulative frequency distribution of measured cell diameter for Vgat, Gad1, and Ntsr1-Cre specimens ( $n = 194$ , 5 mice). (C). Ntsr1 and Ntsr1<sup>RN</sup> ( $n = 125$ , 4 mice) label neurons of the same size ( $p = 0.8$ ; Mann-Whitney unpaired, two tailed T-test). Mean  $\pm$  SEM is plotted. (D) Example YFP+ cells in a Gad1 (top), Vgat (middle) and Ntsr1 (bottom) specimen. Scale bars represent 50  $\mu\text{m}$ .  $P < 0.05$ , \*,  $p < 0.01$ , \*\*,  $p < 0.001$ , \*\*\*,  $p < 0.0001$ , \*\*\*\*.

### 220 *IntA cell sizes differ according to Cre and intersectional drivers*

221 To better characterize the neurons labeled with these distinct targeting methods, we measured the  
222 cross-sectional area and elliptical diameter of soma across targeting methods. We found  
223 Gad1<sup>IO</sup> neurons ( $17.7 \pm 0.6 \mu\text{m}$  diameter;  $165.7 \pm 9.9 \mu\text{m}^2$  area, mean  $\pm$  SEM,  $n = 113$ , 4 mice) to  
224 be slightly larger than the superset of Gad1 neurons ( $15.5 \pm 0.2 \mu\text{m}$  diameter,  $p = 0.01$ ,  $135.7 \pm$   
225  $4.3 \mu\text{m}^2$  area,  $p = 0.06$ ; mean  $\pm$  SEM; Figure 3). Local interneurons are thought to be smaller  
226 than GABAergic projection neurons, so this size difference could be attributable to the lack of  
227 interneuron label (Batini et al., 1992; Chan-Palay, 1977; De Zeeuw & Berrebi, 1995; Fredette &  
228 Mugnaini, 1991; Schwarz & Schmitz, 1997; Teune et al., 1998; Uusisaari et al., 2007). In  
229 contrast, Vgat-Cre ( $14.3 \pm 0.2 \mu\text{m}$  diameter,  $107.3 \pm 2.5 \mu\text{m}^2$  area) and Vgat<sup>IO</sup> labeled neurons of  
230 similar sizes ( $14.6 \pm 0.2 \mu\text{m}$  diameter,  $p = 0.08$ ;  $103.1 \pm 1.8 \mu\text{m}^2$  area,  $p = 0.83$ ; mean  $\pm$  SEM,  $n =$   
231  $245$ , 3 mice; Figure 3A).

232

233 Finally, we compared these populations to putative excitatory neuron cell sizes. First, we  
234 validated Ntsr1-Cre (gn220) as a cerebellar nuclear cre driver line labeling non-GABAergic  
235 neurons (Dumas et al., 2019). Examination of publicly available dual fluorescent in situ  
236 hybridization expression showed non-overlap of Ntsr1-Cre expression with Gad1 (Figure S1A).  
237 We quantified colocalization of Ntsr1 and Gad1 signal by analyzing pixel overlap relative  
238 to Vgat, Gad1, and Vglut2 colocalization as controls (Figure S1B). Gad1 and Ntsr1 overlap  
239 (average of 19%) was within the noise of presumptive non-overlapping markers, Vglut2  
240 and Vgat (average of 17% overlap). In contrast, Gad1 and Vgat had largely overlapping (average  
241 of 83%) fluorescent pixels in both channels. These data support the conclusion that Ntsr1-Cre  
242 and Gad1-Cre label largely non-overlapping IntA populations (See methods; (Higo et al., 2009;  
243 Houck & Person, 2015)).

244





266 colliculus), and VAL (ventral anterior lateral nucleus of the thalamus, bottom) using projection non-specific (left column) and  
267 projection specific (right column) labeling of Ntsr1 neurons. Scale bars = 200  $\mu$ ms. (F) Graphical representation of average  
268 projection strength in all targeted regions for Ntsr1 and Ntsr1<sup>fl</sup>. Note large degree of overlap. A list of abbreviations can be found  
269 below.

270

### 271 *Anterograde tracing from excitatory output neurons*

272 At first glance, the projections from iIntA neurons appear to recapitulate targets of the putative  
273 excitatory population. To compare iIntA projections more directly to excitatory outputs, we  
274 injected IntA of Ntsr1-Cre mice with AAV1.CAG.flex.GFP (n =3) or

275 AAV2.DIO.EF1a.eYFP (n=2) (Figure 4A-D). As expected, tracing Ntsr1-Cre neurons  
276 from IntA (nIntA) revealed widespread fluorescent terminal fields in the ipsilateral and  
277 contralateral caudal brainstem, the contralateral rostral brainstem, the contralateral thalamus  
278 (Houck & Person, 2015; Low et al., 2018), and layers 7/ 8 in the contralateral cervical spinal  
279 cord of 2/ 4 available spinal cords (Figure 4E; (Sathyamurthy et al., 2020)). nIntA neurons  
280 formed nucleocortical mossy fibers in posterior lobules, such as Paramedian (PM), Copula  
281 (Cop), Crus 1/ 2 (Cr1, Cr2), as well as more anterior intermediate lobules such as 4/5 and  
282 Simplex (Sim) (Gao et al., 2016; Houck & Person, 2015; Tolbert et al., 1978).

283

284 nIntA neurons produced reliable bouton label in forelimb medullary structures such as the  
285 MDRN<sub>v</sub>, PARN, GRN, pontine reticular nuclei (PRN) and magnocellular reticular nucleus  
286 (MARN; Figure 4E; (Esposito et al., 2014)). nIntA also labeled terminals in the GRN/ MARN  
287 region resided just dorsal to the boundary of IO (See supplement). Additionally, in 3 of 6  
288 animals, we observed a small patch of terminals within the dorsal subnucleus of IO (Figures 5A,  
289 S4). We currently are unable to determine if this label was a consequence  
290 of promiscuous Cre expression or if a group of Ntsr1 defined glutamatergic or GABAergic  
291 neurons project to IO. Exclusive retrograde labeling of IO-projecting Ntsr1 neurons was not  
292 practical, due to the proximity of nIntA terminals just dorsal to IO, in the ventral brainstem.

293

294 nIntA projected to many motor-related regions including the lateral reticular nucleus (LRN); all  
295 four subdivisions of the vestibular nuclei (VEST), and the motor nucleus of the trigeminal (V).  
296 Axons extended contralaterally through the PRN, ultimately producing dense innervation of the  
297 TRN (Figure 4E) and limited innervation of the PG (Cicirata et al. 2005; Schwartz and Schmitz  
298 1997). nIntA axons innervated the contralateral RN most densely, with terminals spilling over  
299 into the ventral tegmental area, VTA (Figure S4) (Carta et al., 2019) and extended upward  
300 through the contralateral MRN to innervate the caudal anterior pretectal nucleus (APN;  
301 (Sugimoto et al., 1982)) anterior ventrolateral periaqueductal grey (PAG; B- 4.0-2.4 mm), and  
302 intermediate/ deep layers of the SC (Doykos et al., 2020; Gayer & Faull, 1988), especially the  
303 more rostral and lateral regions (B-3.8-2.8 mm; Figure 4E). Consistent projections were also  
304 observed in brainstem sensory structures targeted by iIntA including: SPV, DCN, PB (especially  
305 the Koelliker-Fuse (KF) subnucleus), and PSV. In addition to VTA, other modulatory regions,  
306 such as the raphe magnus nucleus (RM) and pedunclopontine nuclei (PPN) were targeted  
307 by nIntA.

308

309 At the level of the diencephalon, projections were consistently observed within the contralateral  
310 Zona Incerta (ZI) and thalamus (Figure 4E-F). All specimens exhibited dense terminal fields in  
311 the ventromedial (VM) and anterior ventrolateral (VAL) nuclei of the thalamus (Aumann et al.,  
312 1994; Houck & Person, 2015; Kalil, 1981; Low et al., 2018; Stanton, 1980). Additionally, we  
313 observed terminals in intralaminar thalamic structures including: centromedial (CM), paracentral

314 (PCN), mediodorsal (MD) parafascicular (PF), ventral posterior (VP), and posterior (PO)  
 315 nuclei(Chen et al., 2014; Dumas et al., 2019).

316  
 317 A dominant theme in IntA output projections is collateralization. Recent studies have identified  
 318 other Cre driver lines (Low et al., 2018) labeling subsets of IntA output neurons, raising the  
 319 question whether Ntsr1-Cre projection patterns reflect multiple subsets of neurons or broadly  
 320 reflect a relatively homogenous population that collateralizes widely. To begin to address this  
 321 question, we asked whether projection-specific labeling of nIntA recapitulated tracing from  
 322 Ntsr1-Cre cells. We used the intersectional approach described above to restrict tracing to RN-  
 323 projecting Ntsr1-Cre neurons (Ntsr1<sup>RN</sup> Figure 4A.)  
 324

325 Interestingly, the projection pattern of Ntsr1<sup>RN</sup> was almost identical to the pattern observed  
 326 in nIntA injections, with a few notable exceptions. Namely, nIntA neurons projected to lobule 8,  
 327 APN, and PPN while Ntsr1<sup>RN</sup> neurons did not. We otherwise observed very similar projection  
 328 patterns, including nucleocortical projections mainly targeting lobules 4/ 5, Cr2, Cop and Sim,  
 329 though we observed a decreased tendency for these RN projecting neurons to target the PM  
 330 lobule. We observed terminals in the contralateral thalamus, especially VAL, VM, and CM/ PCN  
 331 as well as layers 7/8 of the contralateral cervical spinal cord in 2 of 3 specimens supporting the  
 332 observation in Sathyamurthy et al. (2020) that contralaterally projecting cerebellospinal neurons  
 333 collateralize to both RN and thalamus. We conclude it is likely that Ntsr1.cre driver lines label a  
 334 population of IntA neurons which are relatively homogenous and distribute information broadly.

335

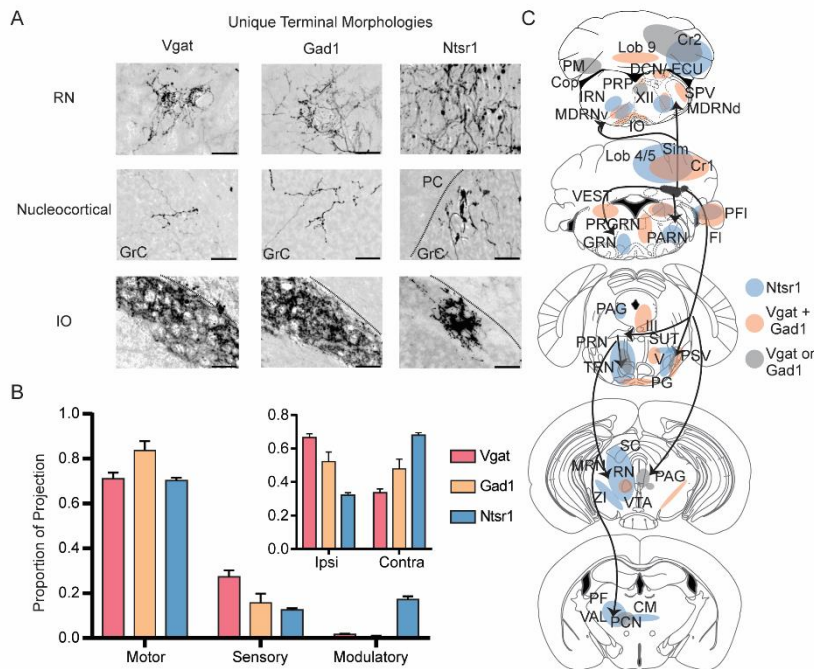

360

### 361 *Direct comparison of nIntA and iIntA projection patterns*

362 Despite targeting many of the same brain regions, terminal morphology or projection patterns of  
 363 the three transgenic lines were distinct, particularly when viewed in light of the functional role of  
 364 target regions (Figure 5A). We grouped extracerebellar target regions into three functional  
 365 classes -- motor, sensory, and modulatory -- based in part on groupings of the Allen Brain Atlas  
 366 (see methods). Inhibitory neurons, particularly Vgat-cre neurons, targeted more sensory

Figure 5. Comparison of iIntA and nIntA projection patterns. (A) Morphology differences in terminal contacts within RN (top), the Cerebellar cortex (middle); boutons observed within the granule cell (GrC) layer; dotted line in Nstr1 image denotes Purkinje Cell layer), and IO (bottom; dotted line indicates dorsal edge of IO). Note mossy fiber nucleocortical terminals seen in Ntsr1-Cre mice but not Gad1 or Vgat-Cre mice. (B) Analysis of average RPS contributions by motor, sensory, or modulatory extracerebellar brain regions. Inlay shows contribution of ipsilateral or contralateral projections to total RPS. (C) Schematic of projection signatures from Ntsr1-Cre (blue), Gad1 and Vgat-Cre (orange), and Gad1 or Vgat-Cre (grey). See list of Abbreviations.

367 structures than nIntA neurons. By contrast, nIntA specimens projected more heavily to  
368 modulatory regions than either of the inhibitory cell labeling transgenic lines and also provide  
369 direct input to the cervical spinal cord (Figure 5B).

370  
371 Other relationships among the projection classes were notable (Figure 5C). Axons  
372 originating from nIntA tended to ramify in contralateral motor-related regions such  
373 as MDRNv, GRN, PRN, PAG and MRN (and mixed regions like ZI) while iIntA axons  
374 predominantly targeted these nuclei ipsilateral to the injection site. On the other hand, excitatory  
375 and inhibitory cell types produced terminals in topographically indistinguishable locations in  
376 the MDRNd, PARN, IRN, X, Y, TRN, RN, and thalamic nuclei, VAL,  
377 VM, VPM, CM/PCN. However, iIntA formed smaller terminal fields on average than did nIntA  
378 and did not project to other nIntA targets within the thalamus. iIntA projections to SC were  
379 largely absent.

380  
381 Axon terminations within cranial nuclei were also largely distinct. nIntA projected more to the  
382 trigeminal motor nucleus (V), ramifying near the outer boundary. Both Vgat and Gad1 neurons  
383 projected to the oculomotor nucleus (III), however, only Vgat specimens showed terminals in the  
384 hypoglossal cranial nuclei (XII). Distinct terminal fields were identified within sensory nuclei.  
385 Inhibitory neurons labeled by both Vgat-Cre and Gad1-Cre mice projected to more lateral  
386 aspects of sensory nuclei SPV and PSV, though Vgat-Cre mice targeted a larger area of  
387 SPV including the most caudal subdivision (SPVc). Vgat-Cre mice also projected more heavily  
388 to the anterior aspect of PSV than either Gad1 or Ntsr1-cre specimens. Ntsr1-cre mice projected  
389 to the medial edge of SPV near the border with MDRNd/ PARN and to PSV near the  
390 border of V.

391  
392 iIntA and nIntA projected to VEST, however, iIntA projected more to the caudal (B-7.0-6.3)  
393 spinal and medial VEST than nIntA. Both nIntA and iIntA formed nucleocortical fibers,  
394 though nIntA tended to target more intermediate lobules while iIntA cells more heavily targeted  
395 posteromedial lobules, especially lobule 9, and flocculus (Fl).

#### 396 *Projections of IntA<sup>RN</sup> neurons traced with AAVretro-Cre*

397  
398 As a final control to challenge the finding that IntA neurons collateralize to both RN and IO, we  
399 injected modified AAV-retrograde-Cre virus into RN while simultaneously injecting a flexed  
400 reporter virus (AAV1- CAG-flex-GFP/ RFP) into IntA of wild type mice (C57BL/6, Charles  
401 River). This method avoids the potential pitfall of ectopic Cre expression in diverse cell types  
402 owing to developmental or other unknown causes. However, in keeping with our core  
403 observations, following these injections, we observed dense contralateral label in both IO and  
404 RN (see Table 1 for total projection profile). We also observed terminals in other locations  
405 consistently targeted by nIntA (MRN, VAL, VPM, VM, PF, MD, PO, SC, ZI) and iIntA (Lob 9,  
406 IO, SPV (lateral edge), ipsilateral PRN, and ECU). We conclude that retrograde uptake  
407 of Cre from synaptic terminals in RN results in reporter expression of both glutamatergic and  
408 GABAergic neurons in IntA, confirming the presence of a collateral projection from iIntA to  
409 both IO and RN.

410

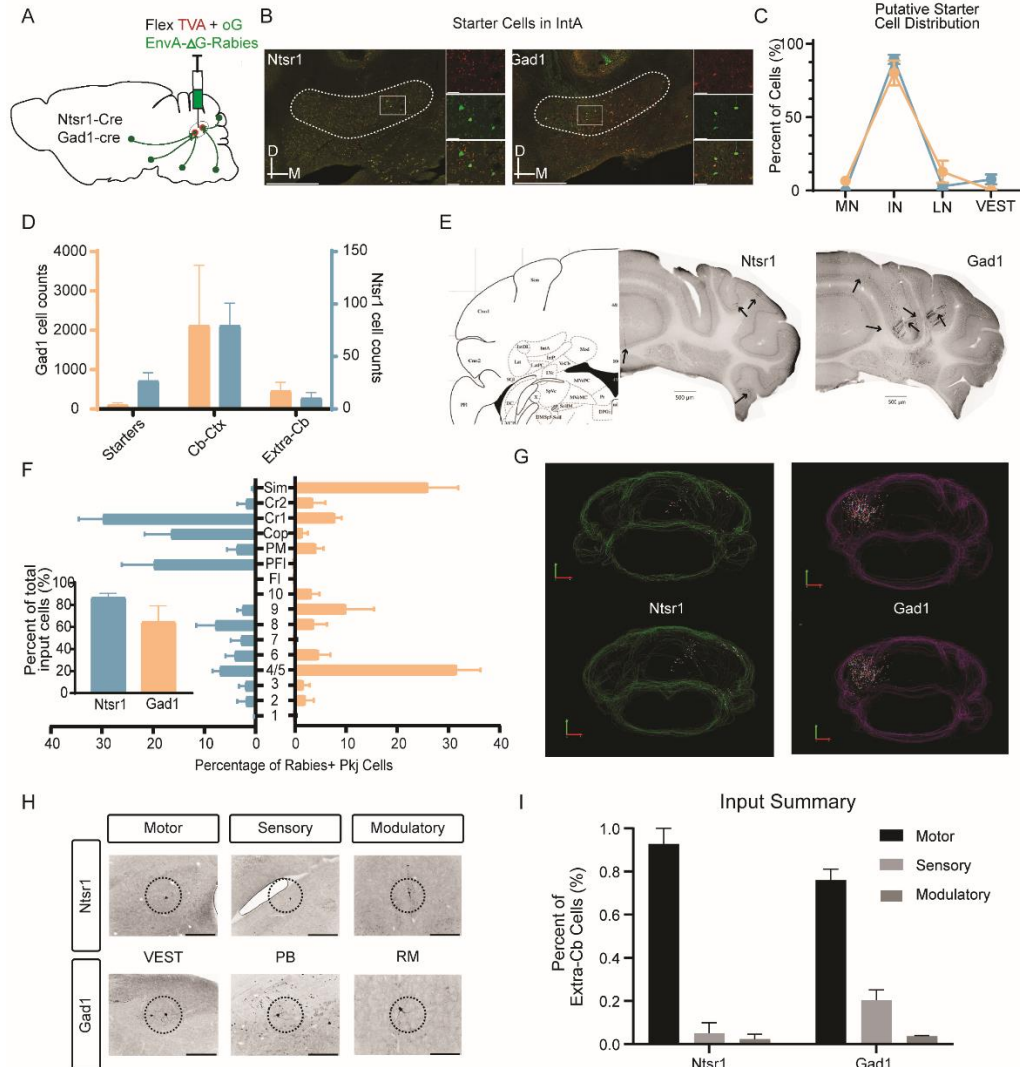

411  
 412  
 413 Figure 6. Monosynaptic tracing of inputs to IntA. (A) Schematic of viral tracing protocol. Cells labeled by this method  
 414 provide monosynaptic input to IntA. (B) Example starter cells from both transgenic mouse lines in IntA. Scale bar = 500  $\mu$ m.  
 415 Insets to the right show oG/ Rabies positive cells (green channel, middle) amid TVA expression (red channel, top), and overlay  
 416 (bottom). Scale bar = 50  $\mu$ m. (C) Distribution of putative starter cells largely overlaps for both cell types (mean + SEM).  
 417 (D) Comparison of number of cells labeled as starter neurons, retrogradely labeled Purkinje Cells (Cb-Ctx), and retrogradely  
 418 labeled neurons outside of the cerebellum (ExtraCb). Gad1 numbers are plotted on the left y-axis (salmon), Ntsr1 numbers are  
 419 plotted on the right y-axis (cyan). (E) Example retrogradely labeled rabies positive PCs. Scale bar = 1 mm. (F) Distribution of  
 420 rabies labeled PCs in different lobules. Inlay shows percentage of all rabies positive cells (excluding starter cells) that were  
 421 identified within the cerebellar cortex. (G) 3D reconstruction of retrogradely labeled PCs in each transgenic mouse line. Note  
 422 restricted distribution in Ntsr1 but not Gad1 mice. (H) Example extracerebellar rabies positive cells in motor (vestibular- VEST),  
 423 sensory (parabrachial- PB), and modulatory (raphe magnus- RM) brain regions for both mouse lines. (I) Percent of  
 424 extracerebellar inputs to Gad1 or Ntsr1 cells separated by modality.  
 425

### 426 *Cell type specific input tracing using monosynaptic rabies virus*

427 Having mapped novel inhibitory pathways from the interposed nucleus, we next asked about  
 428 afferents to diverse cell types. To identify inputs to different IntA cell types, we used modified  
 429 rabies (EnvA- $\Delta$ G-Rabies-GFP) and Cre-dependent receptor and transcomplementation helper  
 430 viruses (AAV1-EF1.Flex.TVA.mCherry, AAV9.Flex.H2B.GFP.2A.oG, Figure 6A, (E. J. Kim et  
 431 al., 2016; Wall et al., 2010; Watabe-Uchida et al., 2012; Wickersham et al., 2007, 2010). Gad1-

432 cre (n = 3) and Ntsr1-Cre (n = 6) mice were used to isolate inputs to distinct IN populations  
433 (Figure 6 B). Direct rabies virus infection is limited to cells which express the necessary  
434 receptor, TVA, and the transsynaptic movement of the modified rabies virus is restricted to a  
435 single jump by the complementation of oG expression in defined cell types. In this way, we were  
436 able to identify monosynaptic inputs to a specified set of starter cells. Analyzed specimens had  
437  $86.3 \pm 3.5\%$  (mean  $\pm$  sem; Figure 6 B-C) starter cells within Int; however Gad1-Cre  
438 rabies experiments resulted in many more labeled cells at the injection site (Figure 6 B-C, Table  
439 S3).

440  
441 The nuclei receive a massive projection from Purkinje cells, so we first analyzed  
442 the distribution of these retrogradely labeled inputs. Notably, the distribution of retrogradely  
443 labeled Purkinje cells (PC) differed in location for the two cell types (Figure 6 E, F). PC label  
444 following nIntA rabies infection typically appeared in more lateral lobules with most of the  
445 rabies labeled cells residing in Cr1 (29.8%), PFI (19.8%), and Cop (16.5%) which, based on  
446 anterograde tracing data, also receive direct feedback from nIntA suggesting reciprocal loops. In  
447 contrast, the distribution of input to Gad1<sup>IN</sup> from PCs was more heavily influenced by the  
448 intermediate lobules 4/5 (31.6%) and Sim (26.0%). Unsurprisingly, the majority (>60% of all  
449 rabies positive cells outside the CbN) of the inputs to both cell types were comprised of  
450 ipsilateral PCs (Figure 6F, inlay); however, nIntA received a greater proportion of their  
451 total input from the cerebellar cortex than Gad1<sup>IN</sup>. 3D reconstruction of rabies positive PCs  
452 (Figure 6G) showed a highly spatially restricted and organized PC label following  
453 sparse nIntA starter label and broadly topographic PC label following iIntA starter label.  
454 Extracerebellar input to nIntA was very sparse, while diverse and wide-ranging inputs were  
455 labeled following Gad1-cre starter cell label. Both IntA cell types receive input from brain  
456 regions related to motor, sensory, or modulatory functions (Figure 6H-I), largely corroborating  
457 previous observations with traditional tracers in the cerebellar cortex (Fu et al.,  
458 2011). Interestingly, the nIntA neurons were contacted predominately by neurons from motor  
459 related regions (93%), while Gad1<sup>IN</sup> neurons were contacted by neurons from more  
460 diverse regions, with motor (74%), sensory (22%), or modulatory (4%; Figure 6I) functions. This  
461 patterned mirrored targeting patterns of these cell types. For a complete list of brain regions  
462 which provide input to nIntA and iIntA see Table 2 and Figure S5.

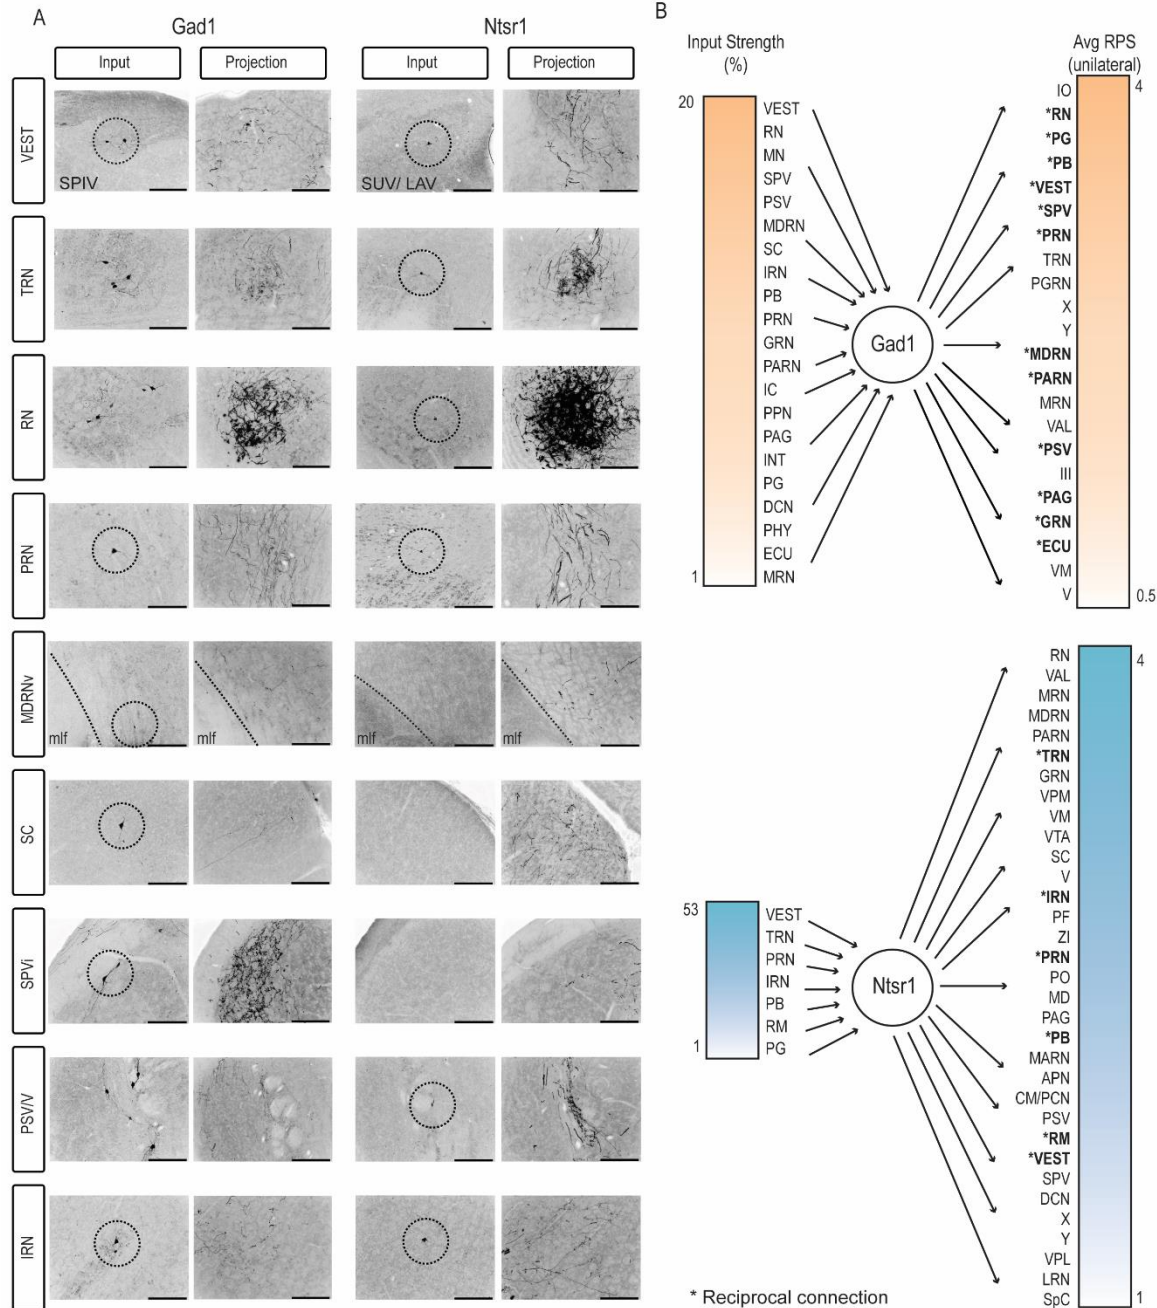

463

464 Figure 7. Reciprocal loops between IntA and extracerebellar targets, for both Gad1 and Ntsr1 cells. (A) Images depicting rabies  
 465 labeled cells (columns 1 and 3, rabies + cells circled if singular or very small) and projections to the same regions at the same  
 466 coordinates relative to bregma (columns 2 and 4). (B) Inputs and outputs listed in order of increasing percent of rabies labeled  
 467 cells (left) and relative projection strength (right). Only inputs with greater than 1% of total extracerebellar rabies labeled cells  
 468 and regions with mean relative projection strengths greater than 1 are listed. Asterisks denote regions that were identified in both  
 469 retrograde and anterograde tracing.

470

471 We observed retrogradely labeled cells from both hemispheres in many regions, although the  
 472 majority of extracerebellar input neurons to IntA reside in the ipsilateral hemisphere. The main  
 473 extracerebellar projection to nIntA came from VEST (53%), followed by TRN (25%, [Schwarz &  
 474 Schmitz, 1997](#)), PRN (6%), and IRN (5%). A core extracerebellar projection to Gad1<sup>IN</sup> also came  
 475 from VEST (20%) and TRN (8%, ([Mihailoff, 1993](#))). However, Gad1<sup>IN</sup> was also contacted

476 robustly by RN (8%), MN (8%), SPV (6%), PSV (5%), MDRN (4%), and SC (4%) which in turn  
477 receive a projection, apart from MN, from both cell types (Figure 7A, B). We only observed  
478 terminal fields in the contralateral MN in a single anterograde tracing Gad1 specimen and 3 of 4  
479 Vgat-restricted specimens, despite the presence of retrogradely labeled cells in the contralateral  
480 MN and IN nuclei following a modified rabies injection to the ipsilateral IntA of Gad1-cre mice.  
481 Rabies labeled neurons in the contralateral CbN may indicate a cross-hemisphere projection from  
482 neurons not genetically defined by Ntsr1 or Gad1. Many canonical sources of mossy fibers, such  
483 as ECU, PRN/TRN/PG, LRN (Parenti et al., 1996) were identified as sources of nuclear input as  
484 well as recipients of a projection from at least one cell type within IntA. Figure 7 B summarizes  
485 the inputs and outputs of both cell types ordered by percentage of rabies labeled cells or  
486 RPS. The only IntA brain regions which received a projection but were not also retrogradely  
487 labeled were the thalamic nuclei, ZI, APN, PRP, and Nucleus Y.

488

## 489 Discussion

490

491 Here we systematically examined the input and output patterns of diverse cell populations of the  
492 cerebellar nucleus, IntA, using intersectional viral tracing techniques. Consistent with previous  
493 work, we found that the putative excitatory output neurons of IntA collateralize widely to many  
494 regions of the contralateral brainstem, spinal cord and thalamus and more restrictedly to the  
495 caudal ipsilateral brainstem, including to regions recently shown to control forelimb  
496 musculature. However, in contrast to long-standing dogma, we also found that inhibitory  
497 GABAergic projection neurons of IntA innervate many brainstem regions including the red  
498 nucleus, pontine nuclei, medullary reticular nuclei, and sensory brainstem structures such as SPV  
499 and PSV. Interestingly, IO-projecting neurons collateralize to comprise, in part, these  
500 projections. Inputs to these distinct cell types were also mapped using monosynaptic rabies  
501 tracing. We found that inputs to excitatory neurons of IntA are dominated by PCs and receive  
502 predominantly motor-related extracerebellar input. By contrast, inhibitory neurons receive  
503 extracerebellar input from a more diverse set of nuclei, including motor, sensory, modulatory,  
504 and mixed modality brain regions, in addition to broader PC input. Merging anterograde and  
505 retrograde datasets, reciprocal loops between IntA and brainstem targets were common for both  
506 cell types.

507

508 Among the most surprising results was the widespread ramification of GABAergic neurons  
509 of IntA. While such a projection was unknown, these data, combined with previous  
510 literature from the medial nucleus, suggest that inhibitory projections from the nuclei may be a  
511 more prominent circuit motif than is currently appreciated. The MN contains glycinergic  
512 projection neurons that innervate ipsilateral brainstem nuclei matching contralateral targets of  
513 excitatory MN neurons (Bagnall et al., 2009). Additional evidence of inhibitory outputs  
514 includes dual retrograde tracing suggesting that nucleo-olivary projections from MN and VEST  
515 collateralize to the ventromedial hypothalamic nucleus (Diagne et al., 2001; Li et al., 2017).  
516 Studies combining retrograde HRP tracing from the basilar pontine  
517 nuclei with immunohistochemistry observed double labeled GABA immunopositive neurons in  
518 the LN of rats and cats (Aas & Brodal, 1989), although the literature is inconsistent (Schwarz &  
519 Schmitz, 1997). More recent work in mice tracing Vgat-cre neurons of the LN listed these  
520 projections targeting a variety of brainstem structures as well as IO (Locke et al., 2018),  
521 but these results were not discussed. Another study restricting tracer to Sox14-Cre expressing  
522 neurons, a transcription factor marking putative nucleo-olivary neurons, showed terminal label in

523 the IO as well as midbrain structures, but label outside IO was interpreted to reflect tracer  
524 leakage to the vestibular nuclei (Prekop et al., 2018). Thus, the limited number of studies to date  
525 that have employed Cre-dependent tract tracing from the nuclei, may have resulted in the lack of  
526 characterization of these inhibitory projections.

527  
528 To alleviate concerns that these surprising projections from Gad1-Cre neurons were a  
529 consequence of ectopic expression of Cre or other methodological artifact, we challenged the  
530 result by employing multiple experimental methods and analyses. First, we used an intersectional  
531 approach, targeting Gad1-Cre expressing neurons that project to the IO. This method of isolating  
532 inhibitory IntA neurons also consistently labeled terminals elsewhere in the brainstem. Second,  
533 we used intersectional methods in a second transgenic mouse line, Vgat-ires-Cre, that also  
534 isolates inhibitory neurons. Data from this mouse line were largely consistent with observations  
535 in the Gad1-Cre line with several nuanced targeting differences (Table 1). Third, projection  
536 patterns of excitatory neurons and intersectional labeled nucleo-olivary projections were  
537 different, particularly within the ipsilateral caudal brainstem and diencephalon. Finally, AAV-  
538 retroCre injections into RN labeled targets matching mixed projections of excitatory and  
539 inhibitory neurons, including terminal label in IO, thus genetic leak of Cre cannot explain the  
540 sum of these observations. Despite these corroborating experimental results, we note that our  
541 data may appear to contradict conclusions drawn from a dual-retrograde tracing study, in  
542 which only minor dual retrograde label was observed in the lateral and interposed nuclei  
543 following tracer injections into IO and RN or IO and TRN (Ruigrok & Teune, 2014). This study  
544 concluded that two distinct populations exist within the CbN: one which projects widely to  
545 several regions and one which projects exclusively to IO. However, this study did report a small  
546 number of cells colabeled by retrograde injections to IO and TRN as well as IO and RN. This  
547 observation may account for the present finding that a population of neurons which projects to  
548 both IO and premotor nuclei exists in smaller numbers, and that topographic specificity may  
549 have precluded previous methods from fully detecting the collateralization of inhibitory  
550 populations.

551  
552 Consistent with projection patterns of glycinergic medial and vestibular nucleus neurons, we  
553 found that iIntA neurons of the interposed had an ipsilateral projection bias, in contrast to the  
554 contralateral bias of nIntA neurons (Bagnall et al., 2009; Prekop et al., 2018; Sekirnjak et al.,  
555 2003; Shin et al., 2011). This organizational structure has been proposed to potentially mediate  
556 axial muscular opponency. Despite this similarity, the ipsilateral projection bias from iInt was  
557 less extreme, with cells of both genotypes projecting bilaterally. Interestingly, IO-projecting  
558 Gad1-cre neurons showed a contralateral bias in their projection patterns, while retaining  
559 ipsilateral projections. Future studies investigating the functional roles of these projections may  
560 explore agonist/antagonist opponency in motor targets of these projections, which remain  
561 lateralized for limb musculature. Additionally, the widespread observation of Purkinje neurons  
562 that increase rates during cerebellar dependent behaviors may suggest the potential for a double  
563 disinhibitory pathway through the nuclei, if these Purkinje neurons converged on inhibitory  
564 nuclear output neurons (De Zeeuw, 2020).

565  
566 Another intriguing distinction between projection targets of distinct cell types was that inhibitory  
567 projections targeted more sensory brainstem structures than excitatory  
568 outputs. Predicting sensory consequences of self-generated movement, termed forward models,  
569 is a leading hypothesis for the role of cerebellum in sensorimotor behaviors. While populations



570 of Purkinje neurons may perform this computation, it is unknown how forward models are used  
571 by downstream targets. Inhibitory projections from cerebellum to sensory areas would seem to  
572 be ideally situated to modulate sensory gain of predicted sensory consequences of  
573 movement (Brooks et al., 2015; Shadmehr, 2020). Moreover, negative sensory prediction error  
574 could be used to actively cancel predicted sensory reafference (Kim et al., 2020; Requarth &  
575 Sawtell, 2014; Shadmehr, 2020), raising implications for a combined role of negative sensory  
576 prediction error in guiding learning both through modulation of climbing fiber signaling in IO  
577 and through modulation of sensory signals reaching the cerebellum upon which associative  
578 learning is built.

579  
580 The present study compliments a recent collection of papers examining cerebellar nuclear cell  
581 types. Transcriptomics analyses of the cerebellar nuclei identified three distinct excitatory cell  
582 types within IntA. These classes included two broad projection types: those that target a wide  
583 array of brainstem nuclei and those that target the ZI (Kebuschull et al., 2020).  
584 Another recent study identified two distinct interposed cell types based on projection patterns to  
585 the spinal cord, which were shown to constitute a minority of neurons (<20%). Nevertheless,  
586 these spinal-projecting neurons collateralized to many other targets, including the MDRNv, RN,  
587 and the VAL (Sathyamurthy et al., 2020). Inhibitory projections were not examined in  
588 these studies, thus it will be interesting to examine how the inhibitory projection neurons  
589 identified in the present study map onto transcript clusters of the inhibitory cell types,  
590 5 total across the nuclei. At a minimum, these clusters would include IO-projecting neurons,  
591 interneurons, MN glycinergic projection neurons, and a collateralizing population of inhibitory  
592 neurons identified here from IntA (Ankri et al., 2015; Bagnall et al., 2009; Fujita et al., 2020;  
593 Zoé Husson et al., 2014; Kebuschull et al., 2020; Sathyamurthy et al., 2020).

594  
595 On the input side of these neuronal populations, we observed differences in the input signatures  
596 of nIntA and iIntA. nIntA received a greater abundance of PC and motor  
597 related precerebellar nuclei input. Other studies have suggested that somatic or dendritic  
598 synapses onto large, presumably glutamatergic, neurons of the CbN are largely from PCs (86%  
599 or 50% respectively), while MF and CF collaterals form 22% and 5% of synapses onto proximal  
600 dendrites (Chan-Palay, 1977; De Zeeuw & Berrebi, 1995; Palkovits et al., 1977). The  
601 present results generally substantiate these conclusions with respect to Ntsr1 cells in IntA. PCs  
602 composed 87% of nIntA inputs while all other extracerebellar regions composed the remaining  
603 13% of rabies positive neurons. Gad1-Cre neurons in IntA received a higher proportion of  
604 extracerebellar inputs (35%) which were more distributed across motor, mixed, sensory, and  
605 modulatory precerebellar regions. It remains unclear if there are differences in input connectivity  
606 between Gad1+ subgroups, specifically interneurons and projection neurons. In comparing input  
607 and outputs to diverse cell types, we noticed that reciprocal loops were common. Previous work  
608 from our lab identified loops between the IN and RN (Beitzel et al., 2017). The present data  
609 extend that theme to many brainstem structures. Such loops resemble neural integrators used in  
610 gaze maintenance or postural limb stabilization (Albert et al., 2020; Cannon & Robinson, 1987),  
611 another potential functional role of the anatomy presented here.

612  
613 These differences in innervation patterns are interesting in light of potentially diverse  
614 computations performed by these cell types. The output of IntA is critical to produce precise  
615 movements, but how different cell types work in tandem to achieve this goal is unresolved.  
616 Dichotomous roles for different cell types have been most clearly hypothesized in delay eyelid

617 conditioning models, where glutamatergic neurons are proposed to produce the conditioned  
618 response while inhibitory neurons regulate the learning ‘setpoint’ via projections to the IO, the  
619 source of climbing fibers (Bengtsson et al., 2007; Garcia & Mauk, 1998; Kim et al., 1998; Kim  
620 et al., 2020; McCormick & Thompson, 1984; Medina et al., 2001; Medina et al., 2002; Ten  
621 Brinke et al., 2017; Thompson & Steinmetz, 2009). These studies assume that premotor  
622 and nucleo-olivary neurons respond in roughly equivalent ways during behavior (Shadmehr,  
623 2020). Differences in the intrinsic and synaptic properties of these neurons, however, raise the  
624 likelihood that this prediction may not be realized (Husson et al., 2014; Najac & Raman, 2017;  
625 Özcan et al., 2020; Uusisaari & Knöpfel, 2008; Uusisaari et al., 2007; Uusisaari & Knöpfel,  
626 2011). Moreover, our data suggest different cell types also differ in their input sources, further  
627 predicting diverse response properties.

628  
629 In conclusion this study opens the door to many potential functional studies that could explore  
630 the roles of inhibitory projections in real-time motor control, sensory prediction and cancellation,  
631 and dynamic cerebellar gain control. Taken together, the present results suggest distinct  
632 computational modules within the interposed cerebellar nuclei based on cell types and shared,  
633 but likely distinct, participation in motor execution.

634

## 635 **Materials and Methods**

636

### 637 *Animals*

638 All procedures followed the National Institutes of Health Guidelines and were approved by the  
639 Institutional Animal Care and Use Committee at the University of Colorado Anschutz Medical  
640 Campus. Animals were housed in an environmentally controlled room, kept on a 12 h light/dark  
641 cycle and had ad libitum access to food and water. Adult mice of either sex were used in all  
642 experiments. Genotypes used were C57BL/6 (Charles River Laboratories), Neurotensin  
643 receptor1-Cre [Ntsr1-Cre; MutantMouse Regional Resource Center, STOCK Tg(Ntsr1-  
644 cre) GN220Gsat/ Mmucd], Gad1-Cre (Higo et al., 2009); Vgat-Cre[#028862]; Jackson Labs].  
645 All transgenic animals were bred on a C57BL/6 background. Gad1 and Ntsr1-Cre mice  
646 were maintained as heterozygotes and were genotyped for Cre (Transnetyx). For all surgical  
647 procedures, mice were anesthetized with intraperitoneal injections of a ketamine hydrochloride  
648 (100 mg/kg) and xylazine (10 mg/kg) cocktail, placed in a stereotaxic apparatus, and prepared  
649 for surgery with a scalp incision. For RN injections, craniotomies were made unilaterally above  
650 RN (from bregma: 3.5 mm, 0.5 mm lateral, 3.6 mm ventral). For IntA injections, unilateral  
651 injections were made at lambda: 1.9 mm posterior, 1.6 mm lateral, 2.1 mm ventral. For IO  
652 injections, the mouse's head was clamped facing downward, an incision was made near the  
653 occipital ridge, muscle and other tissue was removed just under the occipital ridge, and unilateral  
654 injections were made at 0.2 mm lateral, and 2.1 mm ventral with the pipet tilted 10° from  
655 the Obex. This method consistently labeled IO and had the advantage of avoiding accidental  
656 cerebellar label via pipette leakage.

657

### 658 *Viral injections*

659 Injections were administered using a pulled glass pipette. Unilateral pressure injections of 70-  
660 200 nl of Cre-dependent reporter viruses (AAV1.CAG.flex.GFP; AAV2.DIO.EF1a.eYFP;  
661 AAV8.hysn-ConFon.eYFP, see Resources Table) were made into IntA. Injections were centered  
662 on IntA, with minor but unavoidable somatic label appearing in posterior interposed (IntP),  
663 lateral nucleus (LN), and the dorsal region of the vestibular (VEST) nuclei. We occasionally

664 observed minor somatic label in the parabrachial nucleus (PB) and the cerebellar cortex (Cb-Ctx)  
665 anterior or dorsal, respectively, to IntA in Gad1 and Vgat injections. In control injections (n = 3;  
666 virus in C57/Bl6 mice or off-target injection into Ntsr-1 Cre mice), viral expression was not  
667 detected. We did not see appreciable somatic label in the medial nucleus (MN) of any specimens.  
668 To achieve restricted injection sites, smaller volumes were required in Gad1-cre/Vgat-cre mice  
669 compared to Ntsr1-cre mice (70-100 nL vs 150-200 nL, respectively). Retrograde labeling of  
670 RN-projecting IntA neurons was achieved through AAVretro-EF1a-cre (Tervo et al., 2016).  
671 Retrograde injections of RN were performed simultaneously with flex-GFP injections of IntA.  
672 Retrograde virus (AAVretro-EF1a-Flp) was injected to IO one week before reporter viruses  
673 because of the different targeting scheme and mice were allowed to heal one week prior to the  
674 reporter virus injection. All mice injected with AAVs were housed postoperatively for 5 – 6  
675 weeks before perfusion to allow for viral expression throughout the entirety of the axonal arbor.  
676 Control injections were performed where Cre or Flp expression was occluded, either by  
677 performing the injections in wild type mice or in transgenic mice without the Retro-flp injection  
678 into IO or RN, confirming the necessity of recombinase presence in reporter expression (Fenno  
679 et al., 2017).

680  
681 For monosynaptic rabies retrograde tracing, AAV1.EF1.Flex.TVA.mCherry (University of North  
682 Carolina Vector Core; (Watabe-Uchida et al., 2012)) and AAV9.Flex.H2B.GFP.2A.oG (Salk  
683 Gene Transfer, Targeting and Therapeutics Core; (E. J. Kim et al., 2016)) were co-injected  
684 (100 nL of each; vortexed together) unilaterally into IntA of Gad1-Cre and Ntsr1-cre mice. After  
685 a 4-6-week incubation period, a second injection of EnvA.SADΔG.eGFP virus (150-200 nL) was  
686 made at the same location (Salk Gene Transfer, Targeting and Therapeutics Core; (E. J. Kim et  
687 al., 2016; Wall et al., 2010; Wickersham et al., 2007). Mice were sacrificed a week following the  
688 rabies injection and prepared for histological examination.

689  
690 *Tissue Preparation and imaging*  
691 Mice were overdosed with an intraperitoneal injection of a sodium pentobarbital solution, Fatal  
692 Plus (MWI), and perfused transcardially with 0.9% saline followed by 4% paraformaldehyde in  
693 0.1 M phosphate buffer. Brains were removed and postfixed for at least 24 hours then  
694 cryoprotected in 30% sucrose for at least 24 hours. Tissue was sliced in 40 μm consecutive  
695 coronal sections using a freezing microtome and stored in 0.1 M phosphate buffer. Every section  
696 for rabies experiments and every third section for anterograde tracing experiments was mounted  
697 onto slides and imaged. Spinal cord sections were also sliced in 40 μm consecutive coronal  
698 sections with every 4<sup>th</sup> section mounted. Slides were imaged at 10x using a Keyence BZX-800  
699 microscope or a slide-scanning microscope (Leica DM6000BEpifluorescence & Brightfield  
700 Slide Scanner; Leica HC PL APO 10x Objective with a 0.4 numerical aperture; Objective  
701 Imaging Surveyor, V7.0.0.9 MT). Images were converted to TIFF files (OIVIEWER Application  
702 V9.0.2.0) and analyzed or adjusted via pixel intensity histograms in Image J. We inverted  
703 fluorescence images using greyscale lookup tables in order to illustrate results more clearly.

704  
705 *Analysis of overlap by genetically defined neurons*  
706 To distinguish overlap of Cre expression with transmitter markers, we analyzed expression data  
707 publicly available from the Allen Brain Atlas transgenic characterization, experiments (Ntsr1 vs  
708 Gad1) 81582764 and 81747432; (Vglut2 vs Vgat) 304863737; (Vgat vs Gad1) expt #100142488  
709 We applied a threshold to the two fluorescent channels (GFP driven by a transgenic Cre line and  
710 RFP via fluorescent *in situ* hybridization (FISH) staining). We then quantified the percentage of

711 pixel coordinates within Int where fluorescence was detected in both channels (Figure S1A-B).  
712 These images are publicly available from: <https://connectivity.brain-map.org/transgenic>.

713

#### 714 *Cell size analysis*

715 We imaged cells within IntA at 20x then used the “Measure” tool in ImageJ to gather the cross-  
716 sectional area and the “Fit ellipse” measurement to gather minimum and maximum diameter  
717 which we converted from pixels to microns using reference scale bars. We report the maximum  
718 diameter. We analyzed 15-110 well focused and isolated cells for each specimen.

719

#### 720 *Brain region classification*

721 We used a combination of the Allen Mouse Brain Reference Atlas and the *Mouse Brain in*  
722 *Stereotaxic Coordinates* by Franklin and Paxinos to identify brain regions, while noting that  
723 there were minor differences in location, shape and naming of the brain regions between these  
724 reference sources (Lein et al., 2007; Franklin & Paxinos, 2008). In general, we followed  
725 nomenclature and coordinates respective to bregma following the Allen Mouse Brain Reference  
726 Atlas including its classification conventions of motor, sensory, modulatory sources from the  
727 2008 version. Thalamic regions were classified as motor if they project to motor cortices;  
728 sensory if they project to sensory cortices, with intralaminar thalamic nuclei classified as  
729 modulatory. The intermediate and deep layers of the superior colliculus harbored terminal fields  
730 and retrogradely labeled neurons and is thus classified as motor. For cerebellar nuclear  
731 subdivisions, we used the Franklin and Paxinos Atlas. We generally grouped the dorsolateral and  
732 anterior subdivisions of the IN because they were often co-labeled, are difficult to confidently  
733 distinguish, and occur at similar anterior-posterior (AP) coordinates. We classified somatic  
734 reporter protein positive neurons ventral to the three main CbN (IN, LN, MN) and superior  
735 cerebellar peduncle (SCP) as being located within the vestibular nuclei (VEST). This  
736 region includes the superior, lateral, and medial VEST, as well as a ‘vestibular cerebellar’  
737 nucleus defined by the *Mouse Brain in Stereotaxic Coordinates* by Franklin  
738 and Paxinos but excludes the spinal subdivision. In addition, for simplicity, we grouped regions  
739 with many subdivisions or that were depicted with unclear boundaries in *Mouse Brain in*  
740 *Stereotaxic Coordinates* by Franklin and Paxinos as seen in the Allen Brain Atlas (e.g. zona  
741 incerta, ZI, and fields of forrel, FF).

742

#### 743 *Projection quantification*

744 Following viral incubation periods, we mapped terminals to a collection of extracerebellar  
745 targets spanning the anterior-posterior (A-P) axis from the posterior medulla to the thalamus. We  
746 assigned terminal fields a relative projection strength (RPS) of 0-4 based on the density and  
747 anterior-posterior spread (Table 1). The values were assigned relative to the highest density  
748 projection target for each genotype: All Ntsr1-Cre projection fields were assigned relative to the  
749 density of terminals in RN whereas Gad1-Cre and Vgat-Cre specimens were assigned relative to  
750 the density of IO terminals (Figure S1C). Briefly, a terminal field that was both dense and broad  
751 (in spanning the anterior-posterior axis) was assigned a relative projection strength (RPS) of 4,  
752 semi-dense and semi-broad assigned a 3, semi-dense and/ or semi-broad a 2, and fields  
753 determined to be neither dense nor broad but nevertheless present, were assigned an RPS of 1. In  
754 addition, we compared our specimens to analogous preparations published in the Allen Mouse  
755 Brain Connectivity Atlas, specifically the histological profile of Cre-dependent labeling  
756 following injections into IntA of either Ntsr1-Cre or Slc32a1(Vgat)-ires-Cre mice. These  
757 publicly available sources recapitulated projection signatures from lab specimen (Table S1). We

758 included the Allen injection data in our analysis of average projection strength for Ntsr1-Cre  
759 (n=1) and Vgat-Cre (n=1) specimen but did not use the histological images of these injections  
760 here. The full histological profiles of genetically restricted GFP label from the Allen can be  
761 found at: 2011 Allen Institute for Brain Science. Mouse Brain Connectivity Atlas. Available  
762 from: <http://connectivity.brain-map.org/>, experiments #264096952, #304537794.  
763

#### 764 *Rabies quantification*

765 We identified presumptive starter cells as *rabies positive cells* within the cerebellar nuclei where  
766 both mCherry (AAV1.EF1.Flex.TVA.mCherry) and GFP  
767 (AAV9.Flex.H2B.GFP.2A.oG.GFP/ EnvA.SADΔG.eGFP) were expressed. We could not easily  
768 identify cells in which all three components were present due to overlapping fluorescence from  
769 the oG and modified rabies viruses, thus starter cell identification is an estimate. An additional  
770 caveat is that we are unable to distinguish starter cells from local interneurons  
771 infected transsynaptically which may artificially inflate the number of starter cells. While we  
772 occasionally observed oG expression in GABAergic Purkinje cells (PC), Golgi cells (GoC), and  
773 molecular layer interneurons (MLIs) in Gad1-cre mice, TVA was rarely expressed in these areas,  
774 precluding direct infection with rabies virus. Consistent with this, we looked for but did not  
775 observe granule cell (GrC) label, effectively suggesting a lack of transcomplementation in the  
776 cerebellar cortex.  
777

#### 778 **Abbreviations:**

779

|                                          |                                                 |
|------------------------------------------|-------------------------------------------------|
| APN- Anterior Pretectal Nucleus          | MDRNd- Medullary reticular nucleus-<br>dorsal   |
| B- Barrington's Nucleus                  | MDRNv - Medullary reticular nucleus-<br>ventral |
| CbCtx- Cerebellar Cortex                 | MLI- Molecular Layer Interneurons               |
| CbN- Cerebellar Nuclei                   | MN- Medial Cerebellar Nucleus                   |
| CM- Centromedial nucleus of the thalamus | MRN- Midbrain reticular nucleus                 |
| CN- Cochlear Nucleus                     | NLL- nucleus of the lateral lemniscus           |
| CUN- Cuneate Nucleus                     | NTS- Nucleus of the solitary tract              |
| DCN- Dorsal Column Nucleus               | P5- Peritrigeminal nucleus                      |
| DTN- Dorsal Tegmental Nucleus            | PAG- Periaqueductal grey                        |
| ECU- External Cuneate Nucleus            | PARN- Parvicellular reticular nucleus           |
| GoC- Golgi Cells                         | PAS- Parasolitary nucleus                       |
| GRN- Gigantocellular Reticular Nucleus   | PB- Parabrachial nuclei                         |
| IC- Inferior Colliculus                  | PC- Purkinje Cells                              |
| III- Oculomotor Nucleus                  | PCG- Pontine Central Gray                       |
| IN- Interposed Nucleus                   | PCN- Paracentral nucleus of the thalamus        |
| IntA- Anterior Interposed Nucleus        | PDTg- Posterodorsal tegmental nucleus           |
| IO- Inferior Olive                       | PF - Parafascicular nucleus of the thalamus     |
| IRN- Intermediate reticular nucleus      | PG- Pontine gray                                |
| LC- Locus Ceruleus                       | PGRN - Paragigantocellular reticular<br>nucleus |
| LDT- Lateral dorsal tegmental nucleus    | PHY- Perihypoglossal nuclei                     |
| LN- Lateral Cerebellar Nucleus           | PMR- Paramedian reticular nucleus               |
| LRN- Lateral Reticular Nucleus           | PO- Posterior complex of the thalamus           |
| MARN- Magnocellular reticular nucleus    |                                                 |
| MD- Mediodorsal nucleus of the thalamus  |                                                 |

PPN - Pedunculopontine nucleus  
PPY- Parapyramidal nucleus  
PRN- Pontine reticular nucleus  
PRP- Prepositus nucleus  
PRT- Pretectal region  
PSV- Principal sensory nucleus of the trigeminal  
RAmb- Midbrain raphe nucleus  
RM- Nucleus raphe magnus  
RN- Red nucleus  
RPS- Relative Projection Strength  
SAG- Nucleus sagulum  
SC- Superior colliculus  
SLC- Subceruleus nucleus  
SLD- Sublaterodorsal nucleus  
SNr- Substantia nigra, reticulata  
SPVc- Spinal nucleus of the trigeminal, caudal  
SPVi- Spinal nucleus of the trigeminal, interpolar  
SPVo- Spinal nucleus of the trigeminal, oral  
SUT- Supratrigeminal nucleus  
TRN- Tegmental reticular nucleus of the pons  
V- Motor nucleus of the trigeminal  
VAL- Ventral anterior-lateral complex of the thalamus  
VEST- Vestibular nuclei  
VII- Facial motor nucleus  
VM- Ventral medial nucleus of the thalamus  
VPL- Ventral posterolateral nucleus of the thalamus  
VPM- Ventral posteromedial nucleus of the thalamus  
VTA- Ventral tegmental area  
X- Nucleus X  
XII- Hypoglossal nucleus  
Y- Nucleus Y  
ZI- Zona incerta

1  
2

### References:

- 3  
4  
5 Aas, J.-E., & Brodal, P. (1989). Demonstration of a Mamillo-Ponto-Cerebellar Pathway. *The European Journal of Neuroscience*, *1*(1), 61–74.  
6  
7 Albert, S. T., Hadjiosif, A. M., Jang, J., Zimnik, A. J., Soteropoulos, D. S., Baker, S. N., Churchland, M.  
8 M., Krakauer, J. W., & Shadmehr, R. (2020). Postural control of arm and fingers through  
9 integration of movement commands. *ELife*, *9*.  
10 Ankri, L., Husson, Z., Pietrajtis, K., Proville, R., Léna, C., Yarom, Y., Dieudonné, S., & Uusisaari, M. Y.  
11 (2015). A novel inhibitory nucleo-cortical circuit controls cerebellar Golgi cell activity. *ELife*, *4*.  
12 Aumann, T. D., Rawson, J. A., Finkelstein, D. I., & Horne, M. K. (1994). Projections from the lateral and  
13 interposed cerebellar nuclei to the thalamus of the rat: A light and electron microscopic study  
14 using single and double anterograde labelling. *The Journal of Comparative Neurology*, *349*(2),  
15 165–181.  
16 Bagnall, M. W., Zingg, B., Sakatos, A., Moghadam, S. H., Zeilhofer, H. U., & Lac, S. du. (2009).  
17 Glycinergic Projection Neurons of the Cerebellum. *Journal of Neuroscience*, *29*(32), 10104–  
18 10110.  
19 Batini, C., Compoint, C., Buisseret-Delmas, C., Daniel, H., & Guegan, M. (1992). Cerebellar nuclei and  
20 the nucleocortical projections in the rat: Retrograde tracing coupled to GABA and glutamate  
21 immunohistochemistry. *Journal of Comparative Neurology*, *315*(1), 74–84.  
22 Becker, M. I., & Person, A. L. (2019). Cerebellar Control of Reach Kinematics for Endpoint Precision.  
23 *Neuron*, *103*(2), 335-348.e5.  
24 Beitzel, C. S., Houck, B. D., Lewis, S. M., & Person, A. L. (2017). Rubrocerebellar Feedback Loop  
25 Isolates the Interposed Nucleus as an Independent Processor of Corollary Discharge Information  
26 in Mice. *The Journal of Neuroscience*, *37*(42), 10085–10096.  
27 Bengtsson, F., Jirenhed, D.-A., Svensson, P., & Hesslow, G. (2007). Extinction of conditioned blink  
28 responses by cerebello-olivary pathway stimulation. *Neuroreport*, *18*(14), 1479–1482.

- 29 Brooks, J. X., Carriot, J., & Cullen, K. E. (2015). Learning to expect the unexpected: Rapid updating in  
30 primate cerebellum during voluntary self-motion. *Nature Neuroscience*, *18*(9), 1310–1317.
- 31 Cannon, S. C., & Robinson, D. A. (1987). Loss of the neural integrator of the oculomotor system from  
32 brain stem lesions in monkey. *Journal of Neurophysiology*, *57*(5), 1383–1409.
- 33 Canto, C. B., Witter, L., & De Zeeuw, C. I. (2016). Whole-Cell Properties of Cerebellar Nuclei Neurons  
34 In Vivo. *PloS One*, *11*(11), e0165887.
- 35 Carta, I., Chen, C. H., Schott, A. L., Dorizan, S., & Khodakhah, K. (2019). Cerebellar modulation of the  
36 reward circuitry and social behavior. *Science (New York, N.Y.)*, *363*(6424), 1
- 37 Chan-Palay, V. (1977). The Cerebellar Dentate Nucleus. In V. Chan-Palay (Ed.), *Cerebellar Dentate  
38 Nucleus: Organization, Cytology and Transmitters* (pp. 1–24). Springer.
- 39 Chen, C. H., Fremont, R., Arteaga-Bracho, E. E., & Khodakhah, K. (2014). Short latency cerebellar  
40 modulation of the basal ganglia. *Nature Neuroscience*, *17*(12), 1767–1775.
- 41 Cooper, S. E., Martin, J. H., & Ghez, C. (2000). Effects of inactivation of the anterior interpositus nucleus  
42 on the kinematic and dynamic control of multijoint movement. *Journal of Neurophysiology*,  
43 *84*(4), 1988–2000.
- 44 De Zeeuw, C. I., & Berrebi, A. S. (1995). Postsynaptic targets of Purkinje cell terminals in the cerebellar  
45 and vestibular nuclei of the rat. *The European Journal of Neuroscience*, *7*(11), 2322–2333.
- 46 De Zeeuw, Chris I. (2020). Bidirectional learning in upbound and downbound microzones of the  
47 cerebellum. *Nature Reviews. Neuroscience*.
- 48 Diagne, M., Delfini, C., Angaut, P., Buisseret, P., & Buisseret-Delmas, C. (2001). Fastigiovestibular  
49 projections in the rat: Retrograde tracing coupled with gammaamino-butyric acid and glutamate  
50 immunohistochemistry. *Neuroscience Letters*, *308*(1), 49–53.
- 51 Doykos, T. K., Gilmer, J. I., Person, A. L., & Felsen, G. (2020). Monosynaptic inputs to specific cell  
52 types of the intermediate and deep layers of the superior colliculus. *Journal of Comparative  
53 Neurology*, *528*(13), 2254–2268.
- 54 Dumas, D. B., Gornati, S. V., Adolfs, Y., Shimogori, T., Pasterkamp, R. J., & Hoebeek, F. E. (2019).  
55 Anatomical development of the cerebellothalamic tract in embryonic mice. *BioRxiv*, 731968.
- 56 Esposito, M. S., Capelli, P., & Arber, S. (2014). Brainstem nucleus MdV mediates skilled forelimb motor  
57 tasks. *Nature*, *508*(7496), 351–356.
- 58 Fenno, L. E., Mattis, J., Ramakrishnan, C., & Deisseroth, K. (2017). A Guide to Creating and Testing  
59 New INTRSECT Constructs. *Current Protocols in Neuroscience*, *80*, 4.39.1-4.39.24.
- 60 Fenno, L. E., Mattis, J., Ramakrishnan, C., Hyun, M., Lee, S. Y., He, M., Tucciarone, J., Selimbeyoglu,  
61 A., Berndt, A., Grosenick, L., Zalocusky, K. A., Bernstein, H., Swanson, H., Perry, C., Diester, I.,  
62 Boyce, F. M., Bass, C. E., Neve, R., Huang, Z. J., & Deisseroth, K. (2014). Targeting cells with  
63 single vectors using multiple-feature Boolean logic. *Nature Methods*, *11*(7), 763–772.
- 64 Fredette, B. J., & Mugnaini, E. (1991). The GABAergic cerebello-olivary projection in the rat. *Anatomy  
65 and Embryology*, *184*(3), 225–243.
- 66 Fu, Y., Tvrdik, P., Makki, N., Paxinos, G., & Watson, C. (2011). Precerebellar Cell Groups in the  
67 Hindbrain of the Mouse Defined by Retrograde Tracing and Correlated with Cumulative Wnt1-  
68 Cre Genetic Labeling. *The Cerebellum*, *10*(3), 570. 1
- 69 Fujita, H., Kodama, T., & du Lac, S. (2020). Modular output circuits of the fastigial nucleus for diverse  
70 motor and nonmotor functions of the cerebellar vermis. *ELife*, *9*.
- 71 Gao, Z., Proietti-Onori, M., Lin, Z., ten Brinke, M. M., Boele, H.-J., Potters, J.-W., Ruigrok, T. J. H.,  
72 Hoebeek, F. E., & De Zeeuw, C. I. (2016). Excitatory Cerebellar Nucleocortical Circuit Provides  
73 Internal Amplification during Associative Conditioning. *Neuron*, *89*(3), 645–657.
- 74 Garcia, K. S., & Mauk, M. D. (1998). Pharmacological analysis of cerebellar contributions to the timing  
75 and expression of conditioned eyelid responses. *Neuropharmacology*, *37*(4–5), 471–480.
- 76 Gayer, N. S., & Faull, R. L. (1988). Connections of the paraflocculus of the cerebellum with the superior  
77 colliculus in the rat brain. *Brain Research*, *449*(1–2), 253–270.
- 78 Gong, S., Doughty, M., Harbaugh, C. R., Cummins, A., Hatten, M. E., Heintz, N., & Gerfen, C. R.  
79 (2007). Targeting Cre recombinase to specific neuron populations with bacterial artificial

- 80 chromosome constructs. *The Journal of Neuroscience: The Official Journal of the Society for*  
81 *Neuroscience*, 27(37), 9817–9823.
- 82 Higo, S., Akashi, K., Sakimura, K., & Tamamaki, N. (2009). Subtypes of GABAergic neurons project  
83 axons in the neocortex. *Frontiers in Neuroanatomy*, 39
- 84 Houck, B. D., & Person, A. L. (2015). Cerebellar Premotor Output Neurons Collateralize to Innervate the  
85 Cerebellar Cortex. *The Journal of Comparative Neurology*, 523(15), 2254–2271.
- 86 Husson, Z., Rousseau, C. V., Broll, I., Zeilhofer, H. U., & Dieudonné, S. (2014). Differential GABAergic  
87 and Glycinergic Inputs of Inhibitory Interneurons and Purkinje Cells to Principal Cells of the  
88 Cerebellar Nuclei. *Journal of Neuroscience*, 34(28), 9418–9431.
- 89 Husson, Z., Rousseau, C. V., Broll, I., Zeilhofer, H. U., & Dieudonné, S. (2014). Differential GABAergic  
90 and Glycinergic Inputs of Inhibitory Interneurons and Purkinje Cells to Principal Cells of the  
91 Cerebellar Nuclei. *The Journal of Neuroscience*, 34(28), 9418–9431.
- 92 Ikai, Y., Takada, M., Shinonaga, Y., & Mizuno, N. (1992). Dopaminergic and non-dopaminergic neurons  
93 in the ventral tegmental area of the rat project, respectively, to the cerebellar cortex and deep  
94 cerebellar nuclei. *Neuroscience*, 51(3), 719–728.
- 95 Kalil, K. (1981). Projections of the cerebellar and dorsal column nuclei upon the thalamus of the rhesus  
96 monkey. *Journal of Comparative Neurology*, 195(1), 25–50.
- 97 Kobschull, J. M., Richman, E. B., Ringach, N., Friedmann, D., Albarran, E., Kolluru, S. S., Jones, R. C.,  
98 Allen, W. E., Wang, Y., Cho, S. W., Zhou, H., Ding, J. B., Chang, H. Y., Deisseroth, K., Quake,  
99 S. R., & Luo, L. (2020). Cerebellar nuclei evolved by repeatedly duplicating a conserved cell-  
100 type set. *Science*, 370(6523).
- 101 Kim, E. J., Jacobs, M. W., Ito-Cole, T., & Callaway, E. M. (2016). Improved Monosynaptic Neural  
102 Circuit Tracing Using Engineered Rabies Virus Glycoproteins. *Cell Reports*, 15(4), 692–699.
- 103 Kim, J. J., Krupa, D. J., & Thompson, R. F. (1998). Inhibitory cerebello-olivary projections and blocking  
104 effect in classical conditioning. *Science (New York, N.Y.)*, 279(5350), 570–573.
- 105 Kim, O. A., Ohmae, S., & Medina, J. F. (2020). A cerebello-olivary signal for negative prediction error is  
106 sufficient to cause extinction of associative motor learning. *Nature Neuroscience*, 1–5.
- 107 Lein, E. S., Hawrylycz, M. J., Ao, N., Ayres, M., Bensinger, A., Bernard, A., Boe, A. F., Boguski, M. S.,  
108 Brockway, K. S., Byrnes, E. J., Chen, L., Chen, L., Chen, T.-M., Chi Chin, M., Chong, J., Crook,  
109 B. E., Czaplinska, A., Dang, C. N., Datta, S., ... Jones, A. R. (2007). Genome-wide atlas of gene  
110 expression in the adult mouse brain. *Nature*, 445(7124), 168–176.
- 111 Li, B., Zhuang, Q.-X., Gao, H.-R., Wang, J.-J., & Zhu, J.-N. (2017). Medial cerebellar nucleus projects to  
112 feeding-related neurons in the ventromedial hypothalamic nucleus in rats. *Brain Structure and*  
113 *Function*, 222(2), 957–971.
- 114 Locke, T. M., Soden, M. E., Miller, S. M., Hunker, A., Knakal, C., Licholai, J. A., Dhillon, K. S., Keene,  
115 C. D., Zweifel, L. S., & Carlson, E. S. (2018). Dopamine D1 receptor positive neurons in the  
116 lateral nucleus of the cerebellum contribute to cognitive behavior. *Biological Psychiatry*, 84(6),  
117 401–412.
- 118 Low, A. Y. T., Thanawalla, A. R., Yip, A. K. K., Kim, J., Wong, K. L. L., Tantra, M., Augustine, G. J., &  
119 Chen, A. I. (2018). Precision of Discrete and Rhythmic Forelimb Movements Requires a Distinct  
120 Neuronal Subpopulation in the Interposed Anterior Nucleus. *Cell Reports*, 22(9), 2322–2333.
- 121 McCormick, D. A., & Thompson, R. F. (1984). Neuronal responses of the rabbit cerebellum during  
122 acquisition and performance of a classically conditioned nictitating membrane-eyelid response.  
123 *The Journal of Neuroscience: The Official Journal of the Society for Neuroscience*, 4(11), 2811–  
124 2822.
- 125 Medina, J. F., Garcia, K. S., & Mauk, M. D. (2001). A mechanism for savings in the cerebellum. *The*  
126 *Journal of Neuroscience: The Official Journal of the Society for Neuroscience*, 21(11), 4081–  
127 4089.
- 128 Medina, Javier F., Nores, W. L., & Mauk, M. D. (2002). Inhibition of climbing fibres is a signal for the  
129 extinction of conditioned eyelid responses. *Nature*, 416(6878), 330–333.



- 130 Mihailoff, G. A. (1993). Cerebellar nuclear projections from the basilar pontine nuclei and nucleus  
131 reticularis tegmenti pontis as demonstrated with PHA-L tracing in the rat. *The Journal of*  
132 *Comparative Neurology*, 330(1), 130–146.
- 133 Najac, M., & Raman, I. M. (2017). Synaptic excitation by climbing fibre collaterals in the cerebellar  
134 nuclei of juvenile and adult mice. *The Journal of Physiology*, 595(21), 6703–6718. ]
- 135 Özcan, O. O., Wang, X., Binda, F., Dorgans, K., De Zeeuw, C. I., Gao, Z., Aertsen, A., Kumar, A., &  
136 Isope, P. (2020). Differential Coding Strategies in Glutamatergic and GABAergic Neurons in the  
137 Medial Cerebellar Nucleus. *The Journal of Neuroscience: The Official Journal of the Society for*  
138 *Neuroscience*, 40(1), 159–170.
- 139 Palkovits, M., Mezey, É., Hámori, J., & Szentágothai, J. (1977). Quantitative histological analysis of the  
140 cerebellar nuclei in the cat. I. Numerical data on cells and on synapses. *Experimental Brain*  
141 *Research*, 28(1), 189–209.
- 142 Parenti, R., Cicirata, F., Pantò, M. R., & Serapide, M. F. (1996). The projections of the lateral reticular  
143 nucleus to the deep cerebellar nuclei. An experimental analysis in the rat. *The European Journal*  
144 *of Neuroscience*, 8(10), 2157–2167.
- 145 Franklin, K. B. J. F., MA, & Paxinos, G. (2008). *The Mouse Brain in Stereotaxic Coordinates, Compact:*  
146 *The Coronal Plates and Diagrams*. Elsevier Science.
- 147 Prekop, H.-T., Kroiss, A., Rook, V., Zagoraiou, L., Jessell, T. M., Fernandes, C., Delogu, A., & Wingate,  
148 R. J. T. (2018). Sox14 Is Required for a Specific Subset of Cerebello–Olivary Projections.  
149 *Journal of Neuroscience*, 38(44), 9539–9550.
- 150 Requarth, T., & Sawtell, N. B. (2014). Plastic corollary discharge predicts sensory consequences of  
151 movements in a cerebellum-like circuit. *Neuron*, 82(4), 896–907.
- 152 Ruigrok, T. J. H., & Teune, T. M. (2014). Collateralization of cerebellar output to functionally distinct  
153 brainstem areas. A retrograde, non-fluorescent tracing study in the rat. *Frontiers in Systems*  
154 *Neuroscience*, 8.
- 155 Sathyamurthy, A., Barik, A., Dobrott, C. I., Matson, K. J. E., Stoica, S., Pursley, R., Chesler, A. T., &  
156 Levine, A. J. (2020). Cerebellospinal Neurons Regulate Motor Performance and Motor Learning.  
157 *Cell Reports*, 31(6), 107595.
- 158 Schwarz, C., & Schmitz, Y. (1997). Projection from the cerebellar lateral nucleus to precerebellar nuclei  
159 in the mossy fiber pathway is glutamatergic: A study combining anterograde tracing with  
160 immunogold labeling in the rat. *The Journal of Comparative Neurology*, 381(3), 320–334.
- 161 Sekirnjak, C., Vissel, B., Bollinger, J., Faulstich, M., & du Lac, S. (2003). Purkinje cell synapses target  
162 physiologically unique brainstem neurons. *The Journal of Neuroscience: The Official Journal of*  
163 *the Society for Neuroscience*, 23(15), 6392–6398.
- 164 Shadmehr, R. (2020). Population coding in the cerebellum: A machine learning perspective. *Journal of*  
165 *Neurophysiology*, 124(6), 2022–2051. 0
- 166 Shin, M., Moghadam, S. H., Sekirnjak, C., Bagnall, M. W., Kolkman, K. E., Jacobs, R., Faulstich, M., &  
167 Lac, S. du. (2011). Multiple Types of Cerebellar Target Neurons and Their Circuitry in the  
168 Vestibulo-ocular Reflex. *Journal of Neuroscience*, 31(30), 10776–10786.
- 169 Stanton, G. B. (1980). Topographical organization of ascending cerebellar projections from the dentate  
170 and interposed nuclei in Macaca mulatta: An anterograde degeneration study. *The Journal of*  
171 *Comparative Neurology*, 190(4), 699–731.
- 172 Sugimoto, T., Mizuno, N., & Uchida, K. (1982). Distribution of cerebellar fiber terminals in the midbrain  
173 visuomotor areas: An autoradiographic study in the cat. *Brain Research*, 238(2), 353–370.
- 174 Ten Brinke, M. M., Heiney, S. A., Wang, X., Proietti-Onori, M., Boele, H.-J., Bakermans, J., Medina, J.  
175 F., Gao, Z., & De Zeeuw, C. I. (2017). Dynamic modulation of activity in cerebellar nuclei  
176 neurons during pavlovian eyeblink conditioning in mice. *ELife*, 6.
- 177 Teune, T. M., Burg, J. van der, Zeeuw, C. I. de, Voogd, J., & Ruigrok, T. J. H. (1998). Single Purkinje  
178 cell can innervate multiple classes of projection neurons in the cerebellar nuclei of the rat: A light  
179 microscopic and ultrastructural triple-tracer study in the rat. *Journal of Comparative Neurology*,  
180 392(2), 164–178.

- 181 Thompson, R. F., & Steinmetz, J. E. (2009). The role of the cerebellum in classical conditioning of  
 182 discrete behavioral responses. *Neuroscience*, *162*(3), 732–755.
- 183 Tolbert, D. L., Bantli, H., & Bloedel, J. R. (1978). Organizational features of the cat and monkey  
 184 cerebellar nucleocortical projection. *The Journal of Comparative Neurology*, *182*(1), 39–56.
- 185 Turecek, J., & Regehr, W. G. (2020). Cerebellar and vestibular nuclear synapses in the inferior olive have  
 186 distinct release kinetics and neurotransmitters. *ELife*, *9*.
- 187 Uusisaari, M., & Knöpfel, T. (2008). GABAergic synaptic communication in the GABAergic and non-  
 188 GABAergic cells in the deep cerebellar nuclei. *Neuroscience*, *156*(3), 537–549.
- 189 Uusisaari, M., & Knöpfel, T. (2010). GlyT2+ neurons in the lateral cerebellar nucleus. *Cerebellum*  
 190 (*London, England*), *9*(1), 42–55.
- 191 Uusisaari, M., & Knöpfel, T. (2011). Functional Classification of Neurons in the Mouse Lateral  
 192 Cerebellar Nuclei. *The Cerebellum*, *10*(4), 637–646.
- 193 Uusisaari, Marylka, Obata, K., & Knöpfel, T. (2007). Morphological and Electrophysiological Properties  
 194 of GABAergic and Non-GABAergic Cells in the Deep Cerebellar Nuclei. *Journal of*  
 195 *Neurophysiology*, *97*(1), 901–911.
- 196 Vong, L., Ye, C., Yang, Z., Choi, B., Chua, S., & Lowell, B. B. (2011). Leptin action on GABAergic  
 197 neurons prevents obesity and reduces inhibitory tone to POMC neurons. *Neuron*, *71*(1), 142–154.
- 198 Wall, N. R., Wickersham, I. R., Cetin, A., De La Parra, M., & Callaway, E. M. (2010). Monosynaptic  
 199 circuit tracing in vivo through Cre-dependent targeting and complementation of modified rabies  
 200 virus. *Proceedings of the National Academy of Sciences of the United States of America*, *107*(50),  
 201 21848–21853.
- 202 Watabe-Uchida, M., Zhu, L., Ogawa, S. K., Vamanrao, A., & Uchida, N. (2012). Whole-brain mapping  
 203 of direct inputs to midbrain dopamine neurons. *Neuron*, *74*(5), 858–873.
- 204 Wickersham, I. R., Lyon, D. C., Barnard, R. J. O., Mori, T., Finke, S., Conzelmann, K.-K., Young, J. A.  
 205 T., & Callaway, E. M. (2007). Monosynaptic Restriction of Transsynaptic Tracing from Single,  
 206 Genetically Targeted Neurons. *Neuron*, *53*(5), 639–647.
- 207 Wickersham, I. R., Sullivan, H. A., & Seung, H. S. (2010). Production of glycoprotein-deleted rabies  
 208 viruses for monosynaptic tracing and high-level gene expression in neurons. *Nature Protocols*,  
 209 *5*(3), 595–606

211 **Acknowledgments:**

212 We thank Courtney Dobrott for sharing expertise in spinal cord removal and Aya Miften for  
 213 assistance in histology. We are grateful to Dr Jason Aoto for preparation of AAVRetro  
 214 viruses. This work was supported by NS114430, NSF CAREER 1749568, and by a grant from  
 215 the Simons Foundation as part of the Simons-Emory International Consortium on Motor  
 216 Control. Imaging of rabies label was performed in the Advanced Light Microscopy  
 217 Core, part of the NeuroTechnology Center at University of Colorado Anschutz Medical Campus  
 218 supported in part by Rocky Mountain Neurological Disorders Core Grant Number P30  
 219 NS048154 and by Diabetes Research Center Grant Number P30 DK116073. Rabies viruses were  
 220 obtained from the Salk GT3 Core Facility of supported by NIH-NCI CCSG: P30 014195, an  
 221 NINDS R24 Core Grant and funding from NEI.

222

223 **Table 1.** Anterograde tracing summary. Average RPS for all specimens in Ntsr1-Cre (n = 6;  
 224 including Allen specimen), Ntsr1RN (n = 4), RN-RetroCre (n = 3), Gad1-Cre (n = 5), Gad1IO (n  
 225 = 4), Vgat (n = 4, including Allen specimen), and VgatIO (n = 3). RPS depicted as symbols (+  
 226 for contralateral RPS, O for ipsilateral RPS). One symbol = avg RPS < 1, two symbols = avg  
 227 RPS ≥ 1 and <2, three symbols = avg RPS ≥2 and <3, four symbols = avg RPS ≥ 3.

| <u>Brain Region</u> | <u>Ntsr1</u> | <u>Ntsr1-RN</u> | <u>RN-Cre</u> | <u>Gad1</u> | <u>Gad1-IO</u> | <u>Vgat</u> | <u>Vgat-IO</u> |
|---------------------|--------------|-----------------|---------------|-------------|----------------|-------------|----------------|
|---------------------|--------------|-----------------|---------------|-------------|----------------|-------------|----------------|

| <i>Motor</i>      |           |           |          |         |          |            |           |
|-------------------|-----------|-----------|----------|---------|----------|------------|-----------|
| RN                | ++++      | ++++      | ++++     | ++      | +++      | ++         | ++        |
| VAL               | ++++<br>o | ++++<br>o | +++      | +       | ++       | oo         | oo        |
| MRN               | ++++<br>o | ++++      | +++<br>o | +       | +++      | +          | o         |
| TRN               | ++++      | ++++      | ++++     | +       | +++      | ++         | ++        |
| VM                | +++       | +++       | +++      | +       | +++<br>o | o          | o         |
| PRN               | +++       | ++        | +++<br>o | +       | ++<br>o  | ++         | ++        |
| SC                | +++       | ++        | +++      | +       | ++       | oo         | oo        |
| GRN               | +++<br>o  | ++<br>o   | ++<br>o  | +       | ++<br>o  | +          | +         |
| MDRN <sub>v</sub> | +++<br>o  | ++<br>o   | +++      | o       | ++       | oo         | ooo       |
| PAG               | +++<br>o  | ++<br>o   | ++<br>o  | o       | ++<br>o  | +          | oo        |
| APN               | ++        |           | ++       |         |          | +          | oo        |
| MARN              | ++        | ++        | ++       |         | +        | +          | +         |
| LRN               | ++<br>o   | +         | oo       | o       | +        | oo         | o         |
| SpC               | ++        | ++        | N/A      |         | o        | oo         | oo        |
| PG                | +         | +         |          | ++<br>o | +        | +++<br>ooo | +++<br>oo |
| IRN               | +         |           |          |         | +        |            |           |
| PARN              | ooo       | oo        | ooo      | o       | oo       | oo         |           |
| MDRN <sub>d</sub> | +         | ooo       | ooo      | oo      | ooo      | oo         | o         |
| VEST              | ooo       | ooo       | oooo     | oo      | ooo      | oo         | o         |
| Y                 | +         |           |          | +       | +        | ++         | +         |
| SUT               | oo        | o         | o        | oo      | oo       | oooo       | ooo       |
| X                 | oo        | o         | oo       | oo      | o        | ooo        | o         |
| V                 | ooo       | oo        | oo       | o       | oo       | oo         | oo        |
| IO                | +         |           | +++      | ++++    | ++++     | ++++       | ++++      |
| RPP               | +         |           |          | oo      | o        | ooo        | ooo       |
| PGRN              |           |           |          |         |          | oo         | oo        |
| III               |           |           |          | oo      | o        | ooo        | oo        |
| XII               |           |           |          | o       | o        | oo         | o         |
|                   |           |           |          | o       |          | +          | +         |
|                   |           |           |          |         |          | oo         | oo        |

|                   |     |    |     |    |    |     |    |
|-------------------|-----|----|-----|----|----|-----|----|
| <b>VII</b>        |     |    |     |    |    | +   |    |
| <b>MN</b>         |     |    |     | +  |    | +   | +  |
| <b>Mixed</b>      |     |    |     |    |    |     |    |
| <b>ZI</b>         | +++ | ++ | ++  |    | ++ | +   |    |
| <b>Sensory</b>    |     |    |     |    | o  | oo  | o  |
| <b>VPM</b>        | ++  | +  | +++ | +  |    |     |    |
| <b>VPL</b>        | ++  | +  | +   |    |    | o   | o  |
| <b>ECU</b>        |     |    | +   |    | +  | ++  | +  |
| <b>DCN</b>        | +   |    | oo  | o  |    | ooo | o  |
| <b>SPVi</b>       | oo  | o  | ++  | +  | +  | +   | +  |
| <b>SPVo</b>       | o   | o  | o   | o  | oo | ooo | oo |
| <b>SPVc</b>       | oo  | oo | oo  | oo | oo | oo  |    |
| <b>PB</b>         |     |    |     | o  |    | oo  | o  |
| <b>PSV</b>        | oo  | oo | oo  | +  | +  | ++  | +  |
| <b>NTS</b>        | oo  | o  | oo  | oo | oo | ooo | o  |
| <b>Modulatory</b> |     |    |     |    |    |     |    |
| <b>VTA</b>        | +++ | ++ | +++ |    | ++ | +   |    |
| <b>PF</b>         | +++ | ++ | +++ |    | ++ | +   |    |
| <b>MD</b>         | +++ | +  | +++ |    |    |     |    |
| <b>PO</b>         | +++ | +  | +   | o  |    |     |    |
| <b>CM/PCN</b>     | ++  | ++ | +++ | +  | ++ |     |    |
| <b>RM</b>         | oo  | o  | ++  |    | +  |     |    |
| <b>PPN</b>        | +   | +  | +   |    |    | +   |    |
| <b>CbCtx</b>      |     |    | o   |    |    |     |    |
| <b>2</b>          |     |    |     |    |    | oo  |    |
| <b>3</b>          |     |    |     |    |    |     |    |
| <b>4/5</b>        | oo  | o  | o   |    |    | oo  |    |
| <b>6</b>          | ooo | oo | ooo | o  | oo |     |    |
| <b>7</b>          | oo  | o  | oo  |    |    | oo  |    |
|                   |     |    |     | o  |    | o   |    |

|     |     |    |     |    |     |       |
|-----|-----|----|-----|----|-----|-------|
| 8   |     |    |     |    |     | ++    |
| 9   | oo  |    | o   | o  |     | ooo   |
| 10  |     |    |     | oo | o   | oooo  |
| F1  |     |    |     | o  |     | +     |
| PF1 |     |    |     | oo |     | ooo   |
| PM  | oo  | o  |     | o  |     | ooo o |
| Cop | ooo | o  | oo  | o  | oo  | oo    |
| Cr1 | ooo | oo | ooo | oo |     | oo o  |
| Cr2 | oo  | o  | o   | o  | oo  | oo    |
| Sim | ooo | oo | oo  | o  | oo  | oo    |
|     | ooo | oo | ooo | o  | ooo | oo    |

228

229 **Resources Table:**

230

| Reagent type                                      | Designation                           | Source                                                                  | Identifiers                                                           | Additional information                                            |
|---------------------------------------------------|---------------------------------------|-------------------------------------------------------------------------|-----------------------------------------------------------------------|-------------------------------------------------------------------|
| Strain, strain background ( <i>Mus musculus</i> ) | C57BL/6J                              | Charles River                                                           | Stock                                                                 |                                                                   |
| Genetic reagent ( <i>Mus musculus</i> )           | Gad1-Cre                              | Gift from Dr. Diego Restrepo, recv'd frozen embryos from Tamamaki group |                                                                       | PMID: 19915725                                                    |
| Genetic reagent ( <i>Mus musculus</i> )           | Ntsr1-Cre                             | MutantMouse Regional Resource Center                                    | Stock, Tg(Ntsr1-cre) GN220Gsat/ Mmucd                                 | PMID: 17855595                                                    |
| Genetic reagent ( <i>Mus musculus</i> )           | Vgat-ires-cre knock-in (C57BL/6J)     | Jackson Labs                                                            | Stock, #028862                                                        | PMID: 21745644                                                    |
| Recombinant DNA Reagent                           | AAV1.CAG.flex.GFP/ RFP                | Addgene                                                                 | 51502 (GFP), 28306 (RFP)<br>Lot #: V41177 (GFP)<br>Lot #: V5282 (RFP) | Titer: 2.0 x 10 <sup>13</sup> (GFP)<br>1.2X10 <sup>13</sup> (RFP) |
| Recombinant DNA Reagent                           | rAAV2.EF1a.DIO.eYFP.WPRE.pA           | UNC                                                                     | Lot #: AV4842F<br>Addgene plasmid # 27056                             | Titer: 4.5X10 <sup>12</sup>                                       |
| Recombinant DNA Reagent                           | AAV8.hysn-ConFon.eYFP                 | Addgene                                                                 | 55650<br>Lot #: V15284                                                | PMID: 24908100<br>Titer: 2.97X10 <sup>13</sup>                    |
| Recombinant DNA Reagent                           | AAVretro-EF1a-FlpO                    | Addgene                                                                 | 55637<br>Lot # V56725                                                 | PMID: 24908100                                                    |
| Recombinant DNA Reagent                           | AAV2-retro-hSyn-cre (GFP-histone tag) | Viral preparations were a gift of Dr. Jason Aoto                        | Addgene plasmid number: 81070                                         |                                                                   |
| Recombinant DNA Reagent                           | AAV9- FLEX-H2B-GFP-2A-oG              | Salk Institute                                                          | Cat #: 74829                                                          | PMID: 27149846<br>Titer: 2.41X10 <sup>12</sup>                    |
| Recombinant DNA Reagent                           | AAV1-EF1-FLEX-TVA-mCherry             | UNC                                                                     | Addgene plasmid#: 38044                                               | PMID: 22681690                                                    |
| Modified Virus                                    | EnvA-Gdeleted-EGFP                    | Salk Institute                                                          | Cat #: 32635                                                          | PMID: 17179932                                                    |

3.47X10<sup>7</sup>

231

232 **Supplementary Figures:**

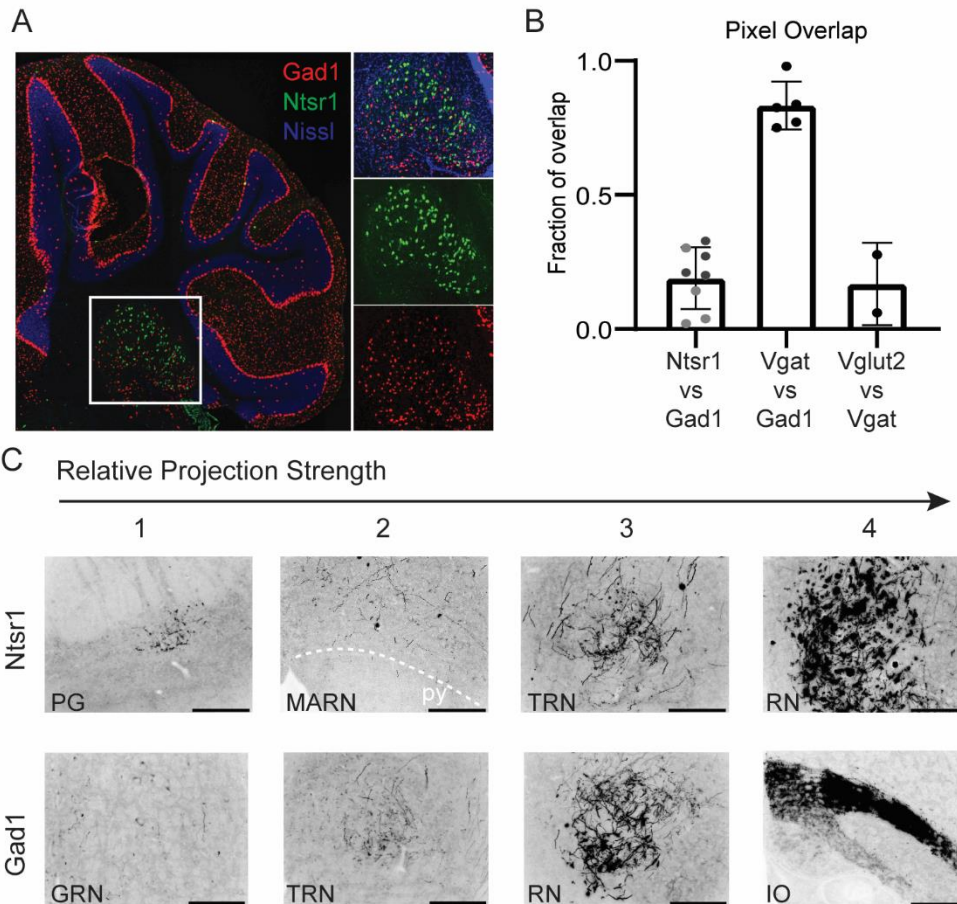

233

234 Supplemental Figure 1. Isolating cell populations and analyzing projection strength. (A) Dual fluorescent in situ hybridization  
 235 showing nonoverlapping populations of Ntsr1+ and Gad1+ cells within IN. Insets show reporter overlap (top), Ntsr1 driven  
 236 fluorescence (middle), and Gad1 in situ hybridization (bottom). (B) Quantification of fluorescent pixel overlap in Ntsr1-Gad1 (2  
 237 mice, 4 parasagittal sections each), Vgat-Gad1 (1 mouse, 5 parasagittal sections), and Vgat-Vglut2 (1 mouse,  
 238 2 parasagittal sections). Mean and standard error are plotted. (C) Example terminal fields in Ntsr1 or Gad1 specimens assigned  
 239 relative projection strengths of 1-4. Note that anterior-posterior spread was also considered. Scale bar represents 200  $\mu$ m.

240

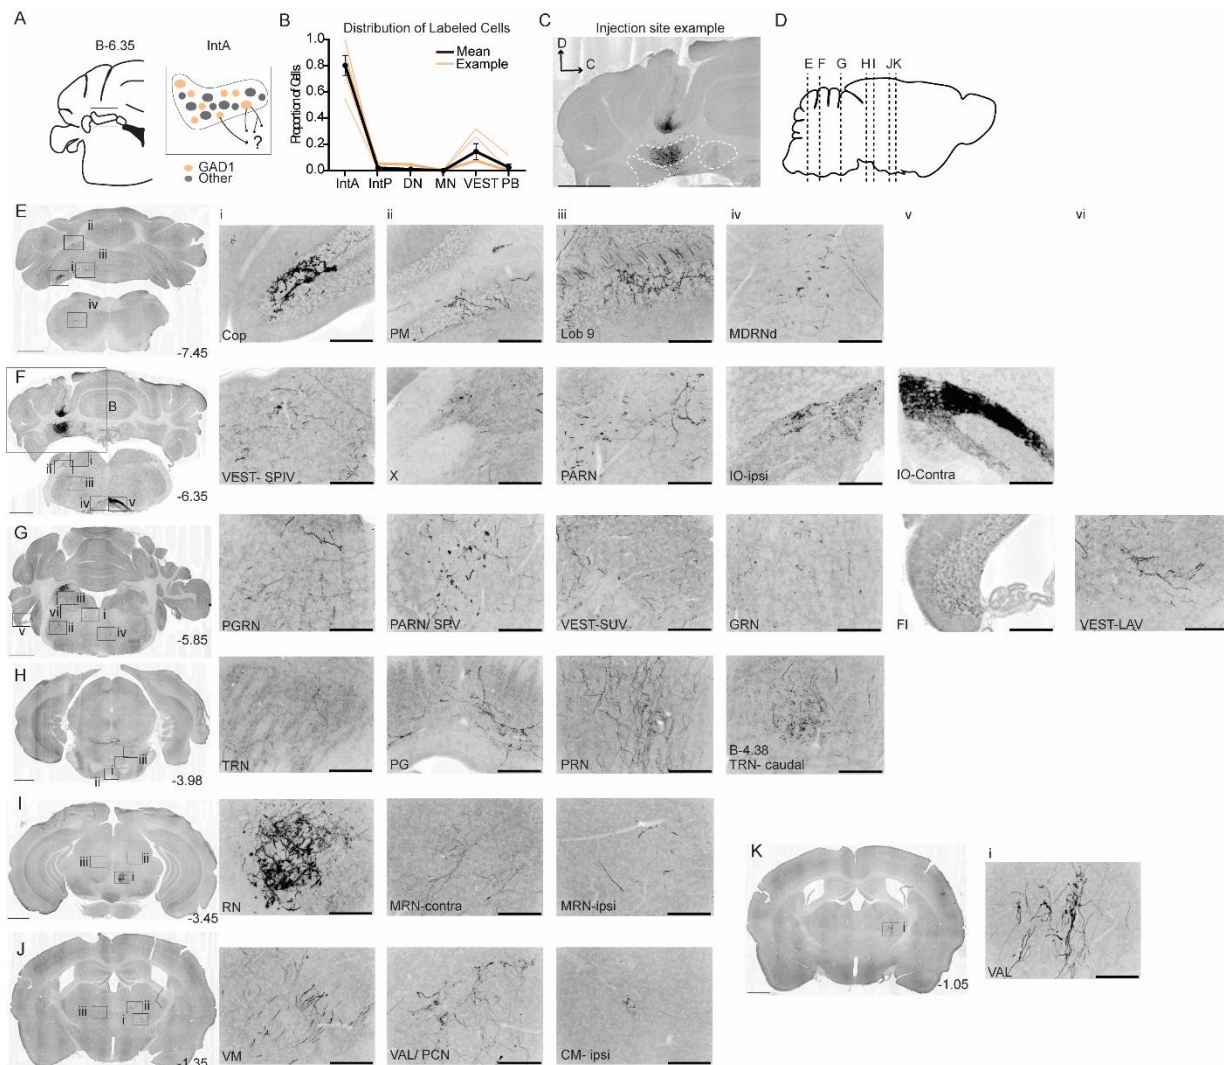

241 Supplemental Figure 2. Anterograde tracing of Gad1 projections from IntA (A) Ideal location for IntA injections (left) and  
 242 depiction of Gad1+ cells within IntA (right). (B) Distribution of labeled cells by injection into IntA of Gad1-cre mice (left). All  
 243 specimen in thin orange lines, example specimen shown to the right denoted by thick orange line, mean of all specimen plotted  
 244 in black with SEM. (C) Example injection site of AAV2-Ef1a-DIO-EYFP in a Gad1-cre mouse (right). Images oriented so right  
 245 of midline is contralateral. (D) Parasagittal mouse brain schematic showing location of coronal sections in E-K. (E) Projection  
 246 targets in caudal cerebellum and brainstem (B-7.45). Boxes expanded in i-vi. (F) Projection targets within the intermediate  
 247 cerebellum (B- 6.35). Injection site depicted in C. Note the dense projection to IO. (G) Projection targets within and ventral to the  
 248 anterior cerebellum (B-5.85). (H) Projection targets to pontine nuclei (B-3.98 and B-4.38 (iv)). (I) Projection targets in the rostral  
 249 midbrain (B-3.45). (J) Projection targets to the caudal thalamus (B-1.35). (K) Projection targets to the rostral thalamus (B-1.05).  
 250 Scale bars (B, C, E-K) represent 1 mm and (i-vi) 200 μms.  
 251

252

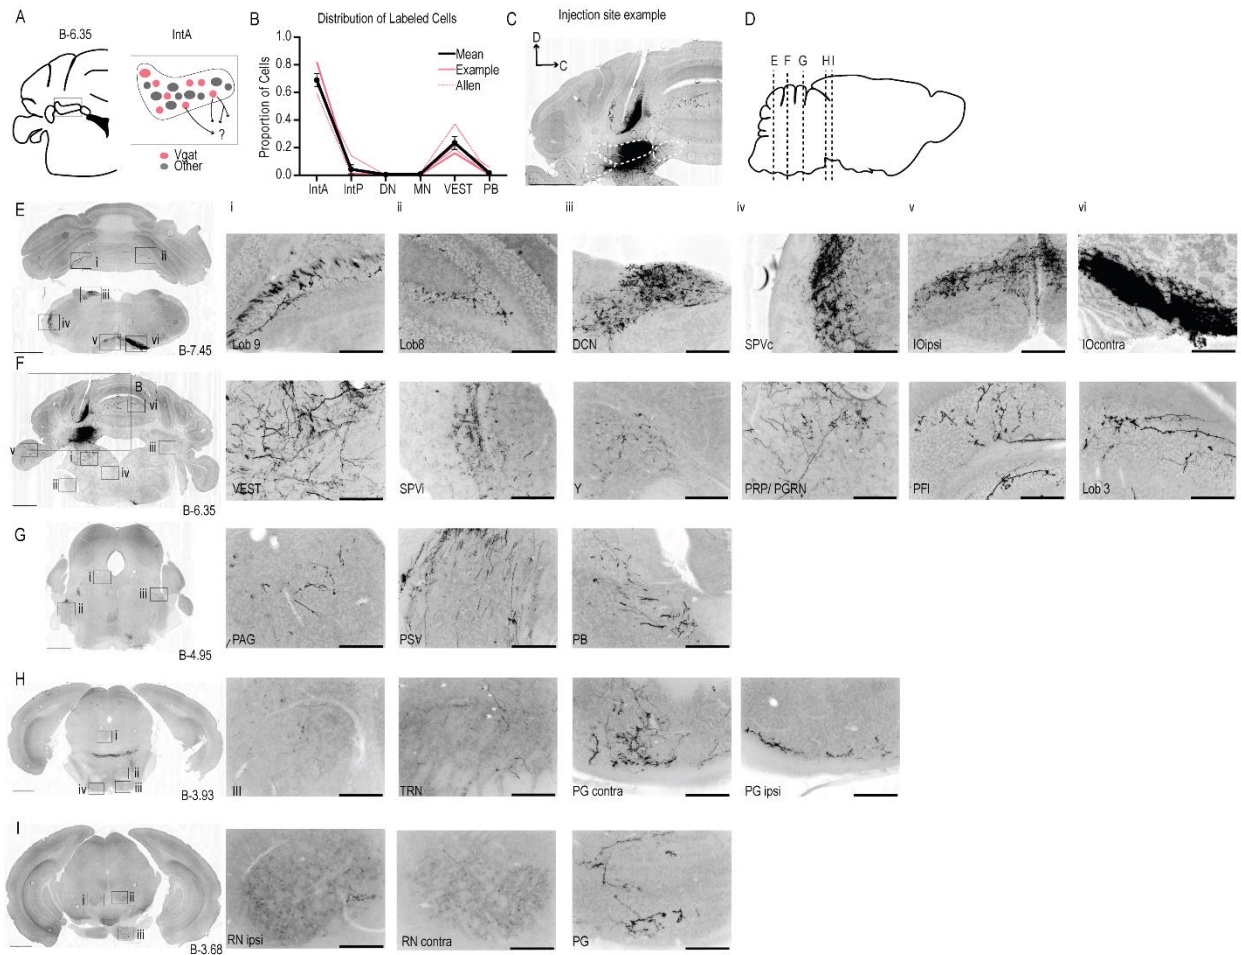

253  
254  
255  
256  
257  
258  
259  
260  
261  
262

Supplemental Figure 3. Anterograde tracing of Vgat projections from IntA (A) Ideal location for IntA injections (left) and depiction of Vgat cells within IntA (right). (B) Distribution of labeled cells by injection into the CbN of Vgat-cre mice. All specimen in thin pink lines, example specimen shown to the right denoted by thick pink line, specimen gathered from the Allen denoted by dotted pink line, mean of all specimen plotted in black with SEM (C) Example injection site of AAV2-EF1a-DIO-eYFP. The three main CbN are outlined in white. Images oriented so right of midline is contralateral. (D) Parasagittal mouse brain schematic showing location of coronal sections in E-I. (E) Projection targets in caudal cerebellum and brainstem (B-.745). Boxes expanded in i-vi. (F) Projection targets within the intermediate cerebellum (B- 6.35). Injection site depicted in C. (G) Projection targets within rostral brainstem (B-4.95). (H) Projection targets in the caudal midbrain (B-3.93). (I) Projection targets to the rostral midbrain (B-3.93). Note sparse terminals in RN.



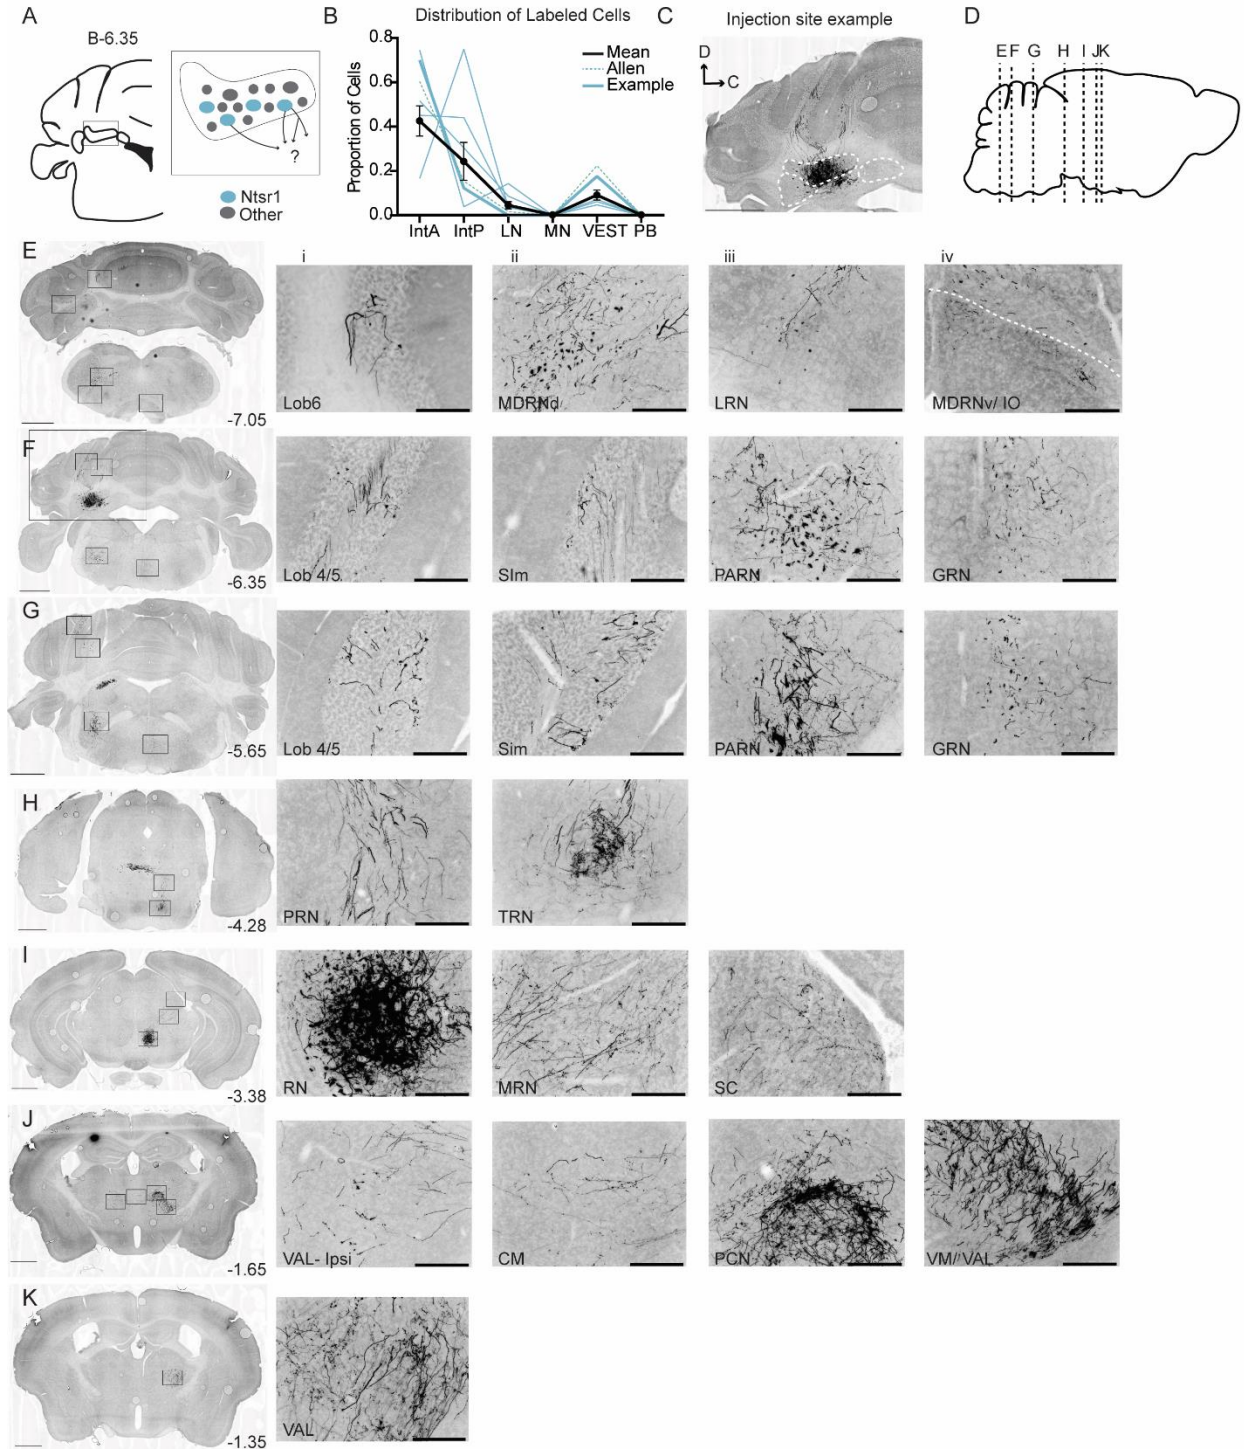

263  
264  
265  
266  
267  
268  
269  
270  
271  
272

Supplemental Figure 4. Anterograde tracing of Ntsr1 projections from IntA. (A) Schematic of target. (B) Distribution of labeled cells by injection into the CbN of Ntsr1-cre mice. All specimen in thin blue lines, example specimen shown to the right denoted by thick blue line, specimen gathered from the Allen denoted by dotted blue line, mean of all specimen plotted in black with SEM (C) Example injection site of AAV2-EF1a-DIO-eYFP in an Ntsr1.cre mouse. The three main CbN are outlined in white. (D) Parasagittal mouse brain schematic showing location of coronal sections in E-K. (E) Projection targets in caudal cerebellum and brainstem (B-7.05). Boxes expanded in i-v. (F) Projection targets within the intermediate cerebellum (B- 6.35). Injection site depicted in C. (G) Projection targets within and ventral to the anterior cerebellum (B-5.65). (H) Projection targets to pontine nuclei (B-4.25). (I) Projection targets in the rostral midbrain (B-3.38). Note

273 the dense terminals in RN. (J) Projection targets to the caudal thalamus (B-1.65). (K) Projection targets to the rostral thalamus  
 274 (B-1.35). Scale bars (B, C, E-K) represent 1 mm and (i-vi) 200  $\mu$ m.  
 275

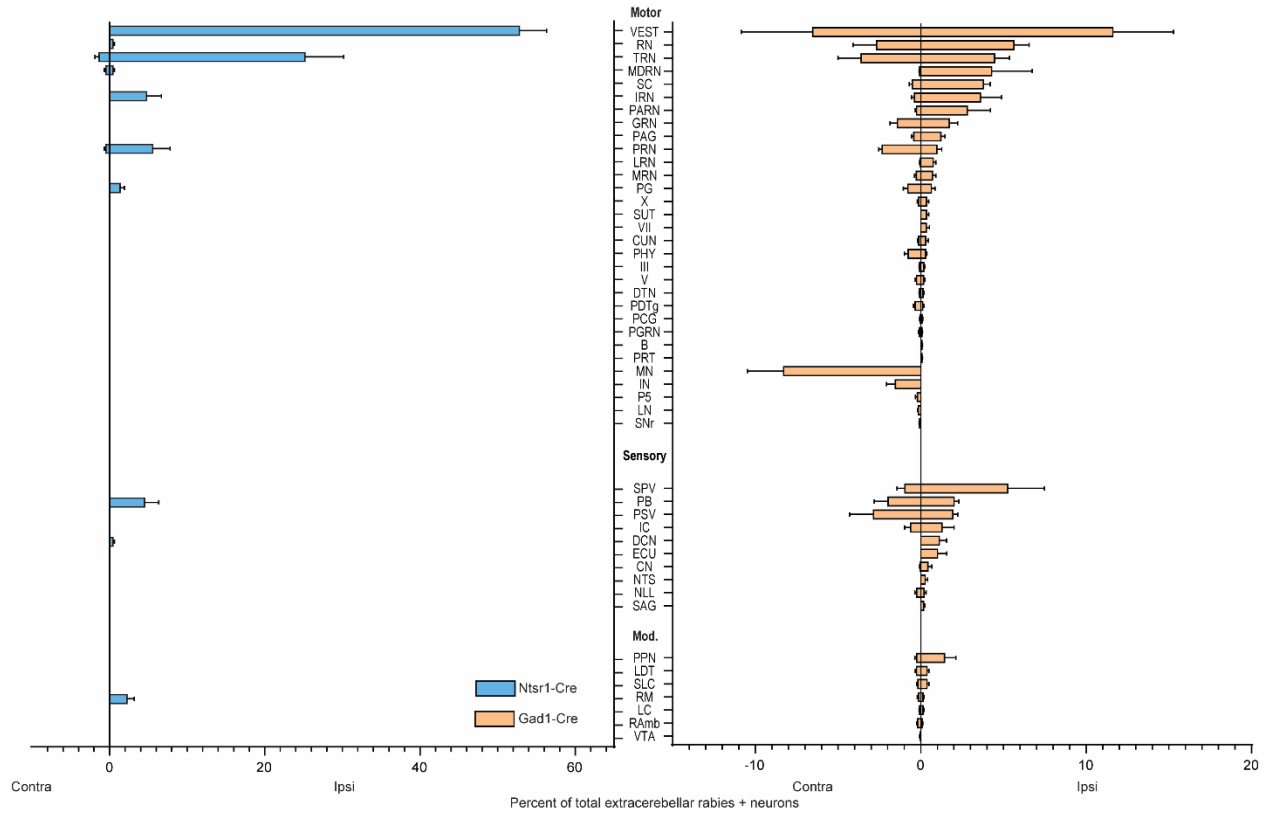

276  
 277  
 278 Supplemental Figure 5. Summary of monosynaptically labeled inputs to Gad1 (orange, n=3 mice) and Ntsr1 (blue, n=6  
 279 mice) neurons in IntA from extracerebellar regions. Mean and standard error are plotted.
