# Supplementary material for: Widespread inhibitory projections from the cerebellar interposed nucleus
Source: bioRxiv preprint, doi:10.1101/2020.12.31.425011, version 2 (2021-08-13)
Supplement: Supplemental Table 1 [file 425011_file04.xlsx]

## Sheet: Sheet1
Ntsr1	allen		45		enj_121019		346		347		352		Ntsr1-RN	NTSR186_retroflp		NTSR1_011320		Ntsr333- rn inj site pretty posterior I think		Ntsr334		vgat	vgat_102220_Rear		vgat_102220_Lear		vgat_102220_Near		allen		vgat_031221_3_Bear		vgat_040921_3_ionto		vgat_IO	1 | Rear		2| Lear		3|Bear		4 | enj110320_1		5 | enj110320_2		WT RetroCre	enj_110718		enj_021319
Motor	ipsi	contra	ipsi	contra	ipsi	contra	ipsi	contra	ipsi	contra	ipsi	contra		i	c	i	c	i	c	i	c		i	c	i	c	i	c	i	c	i	c	i	c		ipsi	contra	ipsi	contra	ipsi	contra	ipsi	contra	ipsi	contra		ipsi	contra	ipsi
RN	0	4	0	4	0	4	0	4	0	4	0	4		0	4	0	4	0	4	0	4		1	2	2	1	2	2	1	2	0	1	0	1		1	1	1	1	1	1	1	2	1	2		0	4	0
VAL	0	4	0	4	0	4	1	3	1	3	0	3		0	4	0	3	0	3	1	4		0	0	0	0	0	0	0	0	0	0	0	0		0	0	0	0	0	0	0	2	0	0		0	3	0
MRN	0	3	0	3	2	4	0	3	0	3	0	1		0	3	0	3	0	3	0	3		2	1	0	0	0	1	1	1	0	0	0	0		0	0	1	0	1	0	0	1	1	0		0	2	0
TRN	0	3	0	3	0	3	0	3	0	3	0	2		0	4	0	2	0	3	0	3		0	2	1	1	1	2	0	2	0	1	0	0		0	1	1	1	1	2	0	2	0	1		0	3	0
VM	0	3	0	3	0	2	0	2	0	2	0	1		0	3	0	2	0	2	0	3		2	0	0	0	0	0	0	0	0	0	0	0		0	0	0	0	0	0	0		0	0		0	2	0
SC	0	2	0	3	0	3	0	2	0	2	0	1		0	3	0	1	0	0	0	2		0	0	0	0	1	0	0	0	0	0	0	0		0	0	0	0	0	0	0	2	0	0		0	2	0
GRN	0	3	0	3	0	3	0	2	1	2	0	0		1	2	0	2	0	1	0	2		2	1	2	1	2	1	2	0	0	0	0	0		2	1	2	1	2	0	0	1	1	0		0	2	0
PRN	0	2	0	2	0	3	0	2	0	1	0	1		0	2	0	0	0	2	0	2		1	1	1	1	1	2	1	2	0	1	0	1		0	2	1	2	2	1	0	1	0	1		0	1	0
MDRNv	2	2	1	2	0	3	0	1	0	1	0	0		0	2	0	0	1	1	0	2		2	0	1	1	1	1	2	0	0	0	0	0		2	1	1	0	2	1	0	0	1	0		0	2	0
PAG	0	2	0	3	1	3	0	1	0	0	0	0		0	2	0	0	0	0	1	3		2	1	1	0	1	0	2	1	1	0	1	0		2	0	0	0	2	0	0	0	1	0		0	2	1
APN	0	2	0	3	0	2	0	2	0	0	0	0		0	0	0	0	0	0	0	0		2	0	0	0	0	0	0	0	0	0	0	0		0	0	0	0	0	0	0	0	0	0		0	0	0
MARN	0	2	0	2	0	2	0	1	0	1	0	0		0	2	0	0	0	1	0	1		0	0	1	0	1	1	1	1	0	1	0	1		0	2	0	0	2	0	0	0	1	1		0	1	0
PG	0	2	0	1	0	1	0	1	0	0	0	1		0	2	0	0	0	0	0	1		2	3	2	3	2	2	2	3	2	2	0	1		1	3	2	2	2	3	1	3	2	3		0	0	0
LRN	0	2	0	1	0	2	1	0	1	0	0	0		0	0	0	0	0	0	0	1		1	1	1	1	1	2	1	0	0	1	0	1		1	0	0	0	1	0	1	0	0	0		0	0	2
IRN	2	0	2	2	2	2	3	0	2	0	0	0		2	0	1	0	2	0	2	0		2	0	2	0	1	0	1	0	0	0	0	0		0	0	0	0	0	0	1	0	0	0		2	0	3
SpC	N/A	N/A	N/A	N/A	0	2	0	0	0	0	0	0		N/A	N/A	0	0	0	1	0	2		0	0	0	0	0	1	N/A	N/A	0	0	0	0		0	0	0	0	0	0	0	0	0	0		N/A	N/A	N/A
IO	0	0	0	0	0	1	0	1	0	1	0	0		0	0	0	0	0	0	0	0		2	4	2	4	2	4	2	4	2	4	2	4		2	4	2	4	2	4	2	4	2	4		0	1	0
MV	1	1	1	1	1	0	0	0	1	0	0	0		1	0	0	0	0	0	0	0		2	2	1	1	1	0	2	1	1	0	0	0		1	0	1	0	1	1	0	0	1	0		0	0	0
LAV	1	0	2	1	2	1	2	0	2	0	1	0		2	0	1	0	1	1	2	1		2	1	2	1	2	1	2	0	1	1	1	0		1	0	1	1	1	1	1	0	1	0		1	0	1
SUV	1	0	2	1	1	1	1	0	1	0	1	0		1	0	0	0	0	0	1	0		3	2	3	2	2	1	3	1	1	0	1	1		2	1	1	1	1	1	1	0	1	1		1	0	0
Y	2	0	2	0	2	2	0	0	0	0	0	0		0	0	1	0	0	0	0	0		3	2	2	1	2	0	2	0	0	0	0	0		0	0	1	0	0	0	0	0	0	0		0	0	0
PARN	4	0	3	1	3	0	3	0	3	0	1	0		3	0	3	0	2	0	3	0		2	0	2	0	2	0	0	0	0	0	0	0		0	0	0	0	1	0	0	0	0	0		3	0	2
SPIV	1	0	2	0	1	1	1	0	1	0	0	0		1	0	1	0	1	1	2	0		3	2	3	2	3	1	2	1	1	1	1	1		2	1	2	0	2	1	0	0	1	1		1	0	1
PRP	0	1	0	0	0	0	0	0	0	0	0	0		0	0	0	0	0	0	0	0		2	0	1	0	1	0	2	0	0	0	0	0		0	0	0	0	0	0	0	0	0	0		1	0	0
MDRNd	4	0	3	0	3	0	3	0	3	0	1	0		3	0	3	0	2	0	2	0		2	1	2	0	1	0	1	0	0	0	0	0		1	0	0	0	1	0	1	0	1	0		3	0	3
SUT	0	0	2	0	2	0	0	0	0	0	0	0		1	0	0	0	0	0	1	0		0	0	0	0	0	0	0	0	0	0	0	0		0	0	0	0	0	0	0	0	0	0		0	0	0
X	2	0	1	0	2	0	0	0	0	0	0	0		0	0	1	0	0	0	0	0		3	1	3	1	2	1	2	0	0	0	0	0		1	0	1	0	0	1	1	0	0	0		2	0	0
V	3	0	2	0	3	0	1	0	1	0	1	0		0	0	2	0	1	0	1	0		2	1	1	2	1	0	1	0	0	0	0	0		0	0	0	0	0	0	0	0	0	0		1	0	1
PGRN	0	0	0	0	0	0	0	0	0	0	0	0		0	0	0	0	0	0	0	0		2	1	2	1	2	1	2	0	0	0	0	0		1	0	2	0	2	1	0	0	1	0		0	0	0
XII	0	0	0	0	0	0	0	0	0	0	0	0		0	0	0	0	0	0	0	0		2	0	2	1	1	0	2	0	0	0	0	0		1	1	2	0	2	0	0	0	1	0		0	0	0
III	0	0	0	0	0	0	0	0	0	0	0	0		0	0	0	0	0	0	0	0		2	0	1	0	1	0	2	0	0	0	0	0		2	0	0	0	0	0	0	0	1	0		0	0	0
VII	0	0	0	0	0	0	0	0	0	0	0	0		0	0	0	0	0	0	0	0		0	1	0	0	0	0	1	0	0	0	0	0		0	0	0	0	0	0	0	0	0	0		0	0	0
MN	0	0	0	0	0	0	0	0	0	0	0	0		0	0	0	0	0	0	0	0		0	1	0	1	0	1	0	0	0	0	0	0		0	0	0	1	0	1	0	0	0	0		0	0	0
Mixed
ZI	0	2	0	3	0	3	0	1	0	1	0	2		0	3	0	0	0	1	0	3		2	1	0	0	0	0	2	0	0	0	0	0		1	0	0	0	1	0	0	0	1	0		0	0	0
Sensory
PB	2	0	2	0	2	0	1	0	2	0	0	0		2	0	2	0	1	0	1	0		2	2	2	1	2	1	3	0	1	1	0	1		0	0	1	1	1	1	0	0	1	1		1	0	1
PSV	2	0	2	0	2	0	1	0	1	0	0	0		0	0	0	0	0	0	1	0		3	1	3	1	2	1	2	0	0	0	0	1		0	0	0	0	0	0	0	0	1	0		1	0	1
CU	1	0	1	0	2	2	1	0	1	0	0	0		0	0	0	0	1	0	1	0		3	0	3	0	3	1	2	0	1	0	0	0		2	0	2	0	1	1	0	0	0	0		0	1	0
SPVo	1	0	0	0	2	0	1	0	1	0	1	0		2	0	2	0	1	0	0	0		2	1	2	0	1	0	1	0	0	0	0	0		0	0	0	0	0	0	1	0	0	0		0	0	1
NTS	1	0	1	0	1	1	0	0	0	0	0	0		0	0	0	0	0	0	0	0		3	2	3	2	1	1	1	0	0	0	0	0		1	1	0	0	0	0	0	0	0	0		0	0	0
SPVi	0	0	0	0	1	0	1	0	1	0	0	0		0	0	0	0	1	0	0	0		2	1	2	1	2	0	2	0	1	0	0	1		2	0	0	0	1	1	1	0	1	1		0	0	2
VPM	0	1	0	2	0	2	0	1	0	1	0	1		0	2	0	0	0	1	0	0		2	0	0	0	0	0	0	0	0	0	0	0		1	0	0	0	1	0	0	1	0	0		0	3	0
VPL	0	3	0	2	0	0	0	0	0	0	0	0		0	2	0	0	0	0	0	1		0	0	0	0	0	0	0	0	0	0	0	0		0	0	0	0	0	0	0	0	0	0		0	0	0
ECU	0	0	0	0	0	0	0	0	0	0	0	0		0	0	0	0	0	0	0	0		3	2	3	2	2	0	2	0	0	0	0	0		1	0	0	0	0	1	0	0	0	0		0	0	1
SPVc	0	0	0	0	0	0	0	0	0	0	0	0		0	0	0	0	0	0	0	0		2	0	2	1	1	1	0	0	1	0	0	1		1	0	0	0	1	0	0	0	1	0		0	0	0
Modulatory
VTA	0	2	0	2	0	3	0	2	0	2	0	3		0	3	0	0	0	0	0	2		0	0	0	0	0	1	0	1	0	0	0	0		0	0	0	0	0	0	0	0	0	0		0	2	0
PF	0	0	0	3	0	3	0	2	0	2	0	2		0	2	0	2	0	1	0	2		0	1	0	0	0	0	0	0	0	0	0	0		0	0	0	0	0	0	0	0	0	0		0	1	0
CM/PCN	0	0	2	2	2	2	1	2	1	2	0	2		0	2	0	2	1	1	1	2		0	0	0	0	0	0	0	0	0	0	0	0		0	0	0	0	0	0	0	0	0	0		0	2	0
MD	0	2	0	2	0	3	0	1	0	1	0	0		0	1	0	0	0	0	0	2		0	0	0	0	0	0	0	0	0	0	0	0		0	0	0	0	0	0	0	0	0	0		0	2	0
PO	0	0	0	3	0	3	0	1	0	2	0	0		0	2	0	0	0	0	0	1		0	0	0	0	0	0	0	0	0	0	0	0		0	0	0	0	0	0	0	0	0	0		0	0	0
RM	0	3	0	2	0	2	0	0	0	0	0	0		0	2	0	0	0	0	0	1		0	0	0	0	0	0	0	0	0	0	0	0		0	0	0	0	0	0	0	0	0	0		0	1	0
PPN	0	1	0	1	0	1	0	0	0	0	0	0		0	0	0	0	0	0	0	0		0	0	0	1	0	1	0	0	0	0	0	0		0	0	0	0	0	0	0	0	0	0		0	0	0
Cb-Ctx
2	0	0	0	0	0	0	0	0	0	0	0	0		0	0	0	0	0	0	0	0		1	0	1	0	2	0	1	0	0	0	0	0		0	0	0	0	0	0	0	0	0	0		0	0	0
3	1	0	2	0	2	0	0	0	1	0	0	0		0	0	0	0	0	0	1	0		2	0	2	0	2	0	1	0	0	0	0	0		0	0	0	0	0	0	0	0	0	0		2	0	0
4/5	3	0	3	0	3	0	2	0	3	0	2	0		1	0	0	0	2	0	2	0		2	1	2	1	2	1	0	0	0	0	0	0		0	0	0	0	0	0	1	0	0	0		2	0	3
6	2	0	2	0	3	0	0	0	0	0	0	0		1	0	0	0	0	0	1	0		1	1	1	0	1	0	1	0	0	0	0	0		0	0	0	0	0	0	0	0	0	0		0	0	2
7	0	0	0	0	0	0	0	0	0	0	0	0		0	0	0	0	0	0	0	0		1	0	1	0	0	0	1	0	0	0	0	0		0	0	0	0	0	0	0	0	0	0		0	0	0
8	1	0	2	0	2	0	0	0	0	0	0	0		0	0	0	0	0	0	0	0		2	1	2	2	2	1	2	1	0	0	0	0		0	0	0	0	0	0	0	0	0	0		0	0	0
9	0	0	0	0	0	0	0	0	0	0	0	0		0	0	0	0	0	0	0	0		3	2	3	2	3	2	3	0	1	0	0	0		0	0	1	0	0	0	0	0	0	0		0	0	0
10	0	0	0	0	0	0	0	0	0	0	0	0		0	0	0	0	0	0	0	0		2	1	1	0	0	0	0	0	0	0	0	0		0	0	0	0	0	0	0	0	0	0		0	0	0
Fl	0	0	0	0	0	0	0	0	0	0	0	0		0	0	0	0	0	0	0	0		3	0	3	0	2	0	3	0	0	0	0	0		0	0	0	0	0	0	0	0	0	0		0	0	0
PFl	0	0	2	0	3	0	0	0	0	0	0	0		1	0	0	0	0	0	1	0		3	0	3	0	2	0	2	0	0	0	0	0		1	0	0	0	0	0	1	0	1	0		0	0	0
PM	2	0	3	0	3	0	1	0	2	0	1	0		1	0	0	0	0	0	2	0		2	0	2	1	1	1	2	0	0	0	0	0		0	0	0	0	0	0	0	0	0	0		1	0	2
Cop	2	0	2	0	3	0	2	0	2	0	1	0		1	0	0	0	2	0	2	0		2	1	2	2	1	1	1	0	0	0	0	0		0	0	1	0	0	0	0	0	0	0		1	0	2
Cr1	1	0	2	0	2	0	0	0	1	0	0	0		1	0	1	0	0	0	0	0		1	0	1	0	1	0	2	0	0	0	0	0		0	0	0	0	0	0	0	0	0	0		0	0	2
Cr2	2	0	3	0	3	0	2	0	1	0	0	0		2	0	0	0	1	0	2	0		2	1	2	0	1	0	2	0	0	0	0	0		0	0	1	0	0	0	0	0	0	0		2	0	1
Sim	3	0	3	0	3	0	2	0	3	0	2	0		2	0	2	0	1	0	2	0		1	0	2	0	0	0	1	0	0	0	0	0		0	0	0	0	0	0	0	0	0	0		2	0	2
Inj Site Mapping
Numbers of Cells
IntA	71		81		95		133		114		103			53		29		19		89			559		489		346		370		178		77			142		237		346		347		193			N/A		N/A
IntP	18		78		56		23		6		36			55		0		0		80			10		7		78		6		0		0			89		10		172		0		30			N/A		N/A
LN	2		8		16		0		22		9			13		0		1		4			11		0		0		4		1		0			34		0		250		40		104			N/A		N/A
MN	0		0		0		0		0		0			0		0		0		0			0		2		8		10		0		0			0		0		6		0		0			N/A		N/A
icgs	27		7		17		35		12		34			13		0		0		21			103		79		88		202		32		0			25		41		17		33		25			N/A		N/A
PB	0		0		0		0		0		0			0		0		0		0			23		3		0		1		0		0			0		2		6		1		0			N/A		N/A
SUV	1		6		0		0		1		0			0		0		0		0			63		20		30		36		0		0			3		15		4		3		13			N/A		N/A
Y	0		0		0		1		0		0			0		0		0		0			17		0		0		2		0		0			2		3		0		0		0			N/A		N/A
LAV	0		0		0		0		0		0			0		0		0		0			35		0		0		0		0		0			2		2		3		0		0			N/A		N/A
Total	119		180		184		192		155		182			134		29		20		194			821		600		550		631		211		77			297		310		804		424		365
[truncated: 7 more columns]
